# Supplementary material for: Aryl(silyl)amino group stabilized hydridosilanediols: synthesis and characterization and use for preparation of alumino(hydrido)siloxanes
Source: Royal Society of Chemistry journal article supplement (doi:10.1039/c6dt00059b), 2016-01-01
Supplement: c6dt00059b1.pdf [file c6dt00059b1.pdf]

## Supporting Information

### **Aryl(silyl)amino group stabilized hydridosilanediols: synthesis and characterization and the use for preparation of alumino(hydrido)siloxanes**

Xiaoping Wang,<sup>a</sup> Jiancheng Li,<sup>a</sup> Shimin Chen,<sup>a</sup> Weiping Liu,<sup>b</sup> Qingsong Ye,<sup>b</sup> and Hongping Zhu<sup>a\*</sup>

<sup>a</sup> *State Key Laboratory of Physical Chemistry of Solid Surfaces, National Engineering Laboratory for Green Chemical Productions of Alcohols-Ethers-Esters, College of Chemistry and Chemical Engineering, Xiamen University, Xiamen, 361005, China.*

<sup>b</sup> *State Key Laboratory for Platinum Group Metals, Kunming Institute of Precious Metals, Kunming, Yunnan Province 650106, China.*

#### **Content:**

- I. X-ray crystallographic data of **6** and **8–11** and crystal structures of **6** and **11**
- II. Table of selected bond lengths and angles of **8–11**
- III. The <sup>1</sup>H, <sup>13</sup>C, and <sup>29</sup>SiNMR spectra of **1–11**

I. X-ray crystallographic data of **6** and **8–11** and crystal structures of **6** and **11**

**Table S1** Crystal data and refinements for compounds **6** and **8–11**

|                                                           | <b>6</b>                                                          | <b>8</b>                                                                                      | <b>9</b>                                                                                      |
|-----------------------------------------------------------|-------------------------------------------------------------------|-----------------------------------------------------------------------------------------------|-----------------------------------------------------------------------------------------------|
| Empirical formula                                         | C <sub>17</sub> H <sub>25</sub> NO <sub>2</sub> Si <sub>2</sub>   | C <sub>40</sub> H <sub>76</sub> Al <sub>2</sub> N <sub>2</sub> O <sub>6</sub> Si <sub>4</sub> | C <sub>56</sub> H <sub>92</sub> Al <sub>2</sub> N <sub>2</sub> O <sub>6</sub> Si <sub>4</sub> |
| formula weight                                            | 331.56                                                            | 847.35                                                                                        | 1055.64                                                                                       |
| crystal system                                            | Triclinic                                                         | Triclinic                                                                                     | Monoclinic                                                                                    |
| space group                                               | <i>P</i> -1                                                       | <i>P</i> -1                                                                                   | <i>Cc</i>                                                                                     |
| CCDC                                                      | 1442616                                                           | 1442617                                                                                       | 1442618                                                                                       |
| <i>a</i> /Å                                               | 10.4955(7)                                                        | 10.0975(9)                                                                                    | 27.6137(17)                                                                                   |
| <i>b</i> /Å                                               | 12.9201(11)                                                       | 10.2652(7)                                                                                    | 9.4580(7)                                                                                     |
| <i>c</i> /Å                                               | 16.0791(11)                                                       | 14.3031(10)                                                                                   | 23.5911(17)                                                                                   |
| <i>α</i> /deg                                             | 109.295(7)                                                        | 73.704(6)                                                                                     |                                                                                               |
| <i>β</i> /deg                                             | 106.762(6)                                                        | 70.848(7)                                                                                     | 98.582(7)                                                                                     |
| <i>γ</i> /deg                                             | 97.856(6)                                                         | 63.167(8)                                                                                     |                                                                                               |
| <i>V</i> /Å <sup>3</sup>                                  | 1904.4(2)                                                         | 1234.17(16)                                                                                   | 6092.3(7)                                                                                     |
| <i>Z</i>                                                  | 4                                                                 | 1                                                                                             | 4                                                                                             |
| $\rho_{\text{calcd}}/\text{g}\cdot\text{cm}^{-3}$         | 1.156                                                             | 1.140                                                                                         | 1.151                                                                                         |
| $\mu/\text{mm}^{-1}$                                      | 0.192                                                             | 1.794                                                                                         | 0.173                                                                                         |
| <i>F</i> (000)                                            | 712                                                               | 460                                                                                           | 2288                                                                                          |
| crystal size/mm <sup>3</sup>                              | 0.40 x 0.30 x 0.20                                                | 0.40 x 0.40 x 0.40                                                                            | 0.30 x 0.20 x 0.10                                                                            |
| $\theta$ range/deg                                        | 3.04–26.00                                                        | 3.31–62.13                                                                                    | 2.94–26.00                                                                                    |
| index ranges                                              | –12 ≤ <i>h</i> ≤ 12<br>–8 ≤ <i>k</i> ≤ 15<br>–19 ≤ <i>l</i> ≤ 19  | –11 ≤ <i>h</i> ≤ 11<br>–11 ≤ <i>k</i> ≤ 11<br>–13 ≤ <i>l</i> ≤ 16                             | –34 ≤ <i>h</i> ≤ 18<br>–11 ≤ <i>k</i> ≤ 11<br>–29 ≤ <i>l</i> ≤ 29                             |
| collected data                                            | 11293                                                             | 7741                                                                                          | 12847                                                                                         |
| unique data                                               | 7416                                                              | 3864                                                                                          | 7358                                                                                          |
|                                                           | ( <i>R</i> <sub>int</sub> = 0.0250)                               | ( <i>R</i> <sub>int</sub> = 0.0247)                                                           | ( <i>R</i> <sub>int</sub> = 0.0632)                                                           |
| completeness to $\theta$                                  | 99.3%                                                             | 99.2%                                                                                         | 99.9%                                                                                         |
| data/restraints/parameters                                | 7416/0/446                                                        | 3864/0/256                                                                                    | 7358/242/604                                                                                  |
| GOF on <i>F</i> <sup>2</sup>                              | 1.024                                                             | 1.045                                                                                         | 1.019                                                                                         |
| final <i>R</i> indices [ <i>I</i> > 2 ( <i>I</i> )]       | <i>R</i> <sub>1</sub> = 0.0512<br><i>wR</i> <sub>2</sub> = 0.1120 | <i>R</i> <sub>1</sub> = 0.0373<br><i>wR</i> <sub>2</sub> = 0.0948                             | <i>R</i> <sub>1</sub> = 0.0873<br><i>wR</i> <sub>2</sub> = 0.1988                             |
| <i>R</i> indices (all data)                               | <i>R</i> <sub>1</sub> = 0.0716<br><i>wR</i> <sub>2</sub> = 0.1214 | <i>R</i> <sub>1</sub> = 0.0439<br><i>wR</i> <sub>2</sub> = 0.1008                             | <i>R</i> <sub>1</sub> = 0.1296<br><i>wR</i> <sub>2</sub> = 0.2265                             |
| Largest diff peak/hole (e <sup>–</sup> ·Å <sup>–3</sup> ) | 0.357/–0.287                                                      | 0.474/–0.277                                                                                  | 0.653/–0.394                                                                                  |

<sup>a</sup> The data were collected at 173(2) K by using Mo K<sub>α</sub> ( $\lambda = 0.71073$  Å) radiation for compounds **6** and **9** and Cu K<sub>α</sub> ( $\lambda = 1.54178$  Å) radiation for compound **8**.  $R_1 = \sum(|F_o| - |F_c|) / \sum|F_o|$ ,  $wR_2 = [\sum w(F_o^2 - F_c^2)^2 / \sum w(F_o^2)]^{1/2}$ ,  $GOF = [\sum w(F_o^2 - F_c^2)^2 / (N_o - N_p)]^{1/2}$ .

|                                                     | <b>10</b>                                                                                      | <b>11</b>                                                                                                 |
|-----------------------------------------------------|------------------------------------------------------------------------------------------------|-----------------------------------------------------------------------------------------------------------|
| Empirical formula                                   | C <sub>68</sub> H <sub>103</sub> Al <sub>2</sub> N <sub>3</sub> O <sub>8</sub> Si <sub>6</sub> | C <sub>46.70</sub> H <sub>77.30</sub> Al <sub>2</sub> N <sub>3.30</sub> O <sub>4.70</sub> Si <sub>4</sub> |
| formula weight                                      | 1313.03                                                                                        | 926.54                                                                                                    |
| crystal system                                      | Monoclinic                                                                                     | Monoclinic                                                                                                |
| space group                                         | <i>P2(1)/n</i>                                                                                 | <i>P2(1)/c</i>                                                                                            |
| CCDC                                                | 1442619                                                                                        | 1442615                                                                                                   |
| <i>a</i> /Å                                         | 12.6280(9)                                                                                     | 15.2140(5)                                                                                                |
| <i>b</i> /Å                                         | 25.7705(17)                                                                                    | 10.4426(3)                                                                                                |
| <i>c</i> /Å                                         | 23.4218(12)                                                                                    | 17.3308(5)                                                                                                |
| <i>α</i> /deg                                       |                                                                                                |                                                                                                           |
| <i>β</i> /deg                                       | 101.117(6)                                                                                     | 103.941(3)                                                                                                |
| <i>γ</i> /deg                                       |                                                                                                |                                                                                                           |
| <i>V</i> /Å <sup>3</sup>                            | 7479.1(8)                                                                                      | 2672.30(14)                                                                                               |
| <i>Z</i>                                            | 4                                                                                              | 2                                                                                                         |
| $\rho_{\text{calcd}}/\text{g}\cdot\text{cm}^{-3}$   | 1.166                                                                                          | 1.151                                                                                                     |
| $\mu/\text{mm}^{-1}$                                | 0.186                                                                                          | 1.689                                                                                                     |
| <i>F</i> (000)                                      | 2824                                                                                           | 1000                                                                                                      |
| crystal size/mm <sup>3</sup>                        | 0.40 x 0.40 x 0.40                                                                             | 0.40 x 0.20 x 0.20                                                                                        |
| $\theta$ range/deg                                  | 2.89–26.00                                                                                     | 4.98– 62.11                                                                                               |
| index ranges                                        | –15 ≤ <i>h</i> ≤ 15<br>–31 ≤ <i>k</i> ≤ 31<br>–28 ≤ <i>l</i> ≤ 28                              | –15 ≤ <i>h</i> ≤ 17,<br>–11 ≤ <i>k</i> ≤ 11,<br>–17 ≤ <i>l</i> ≤ 19                                       |
| collected data                                      | 40158                                                                                          | 16109                                                                                                     |
| unique data                                         | 14677<br>( <i>R</i> <sub>int</sub> = 0.0838)                                                   | 4179<br>( <i>R</i> <sub>int</sub> = 0.0321)                                                               |
| completeness to $\theta$                            | 99.7%                                                                                          | 99.5%                                                                                                     |
| data/restraints/parameters                          | 14677/600/906                                                                                  | 4179/112/334                                                                                              |
| GOF on <i>F</i> <sup>2</sup>                        | 1.044                                                                                          | 1.044                                                                                                     |
| final <i>R</i> indices [ <i>I</i> > 2 ( <i>I</i> )] | <i>R</i> <sub>1</sub> = 0.0879<br><i>wR</i> <sub>2</sub> = 0.2013                              | <i>R</i> <sub>1</sub> = 0.0364<br><i>wR</i> <sub>2</sub> = 0.0990                                         |
| <i>R</i> indices (all data)                         | <i>R</i> <sub>1</sub> = 0.1164<br><i>wR</i> <sub>2</sub> = 0.2180                              | <i>R</i> <sub>1</sub> = 0.0420<br><i>wR</i> <sub>2</sub> = 0.1040                                         |
| Largest diff peak/hole (e·Å <sup>-3</sup> )         | 1.084/–0.488                                                                                   | 0.379/–0.304                                                                                              |

<sup>a</sup> The data were collected at 173(2) K by using Mo K $\alpha$  ( $\lambda = 0.71073$  Å) radiation for compound **10** and Cu K $\alpha$  ( $\lambda = 1.54178$  Å) radiation for compound **11**.  $R_1 = \sum(|F_o| - |F_c|)/\sum|F_o|$ ,  $wR_2 = [\sum w(F_o^2 - F_c^2)^2/\sum w(F_o^2)]^{1/2}$ ,  $GOF = [\sum w(F_o^2 - F_c^2)^2/(N_o - N_p)]^{1/2}$ .

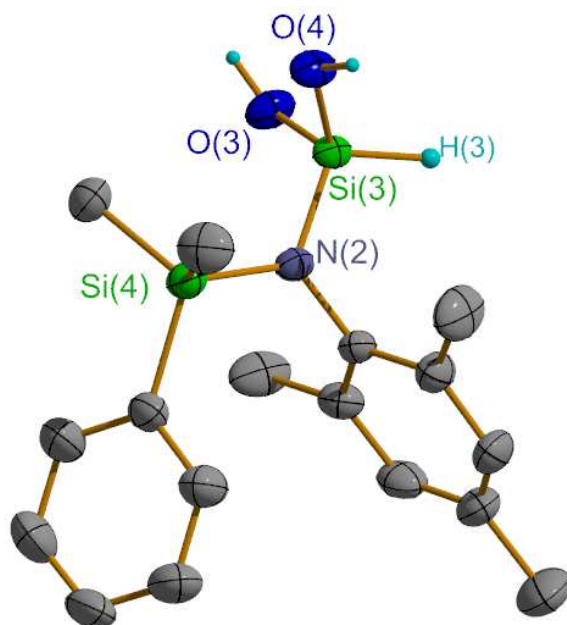

**Figure S1** X-ray crystal structure of another independent molecule of **6** with thermal ellipsoids at 50% probability level. H atoms except for those of SiH and OH are omitted for clarity.

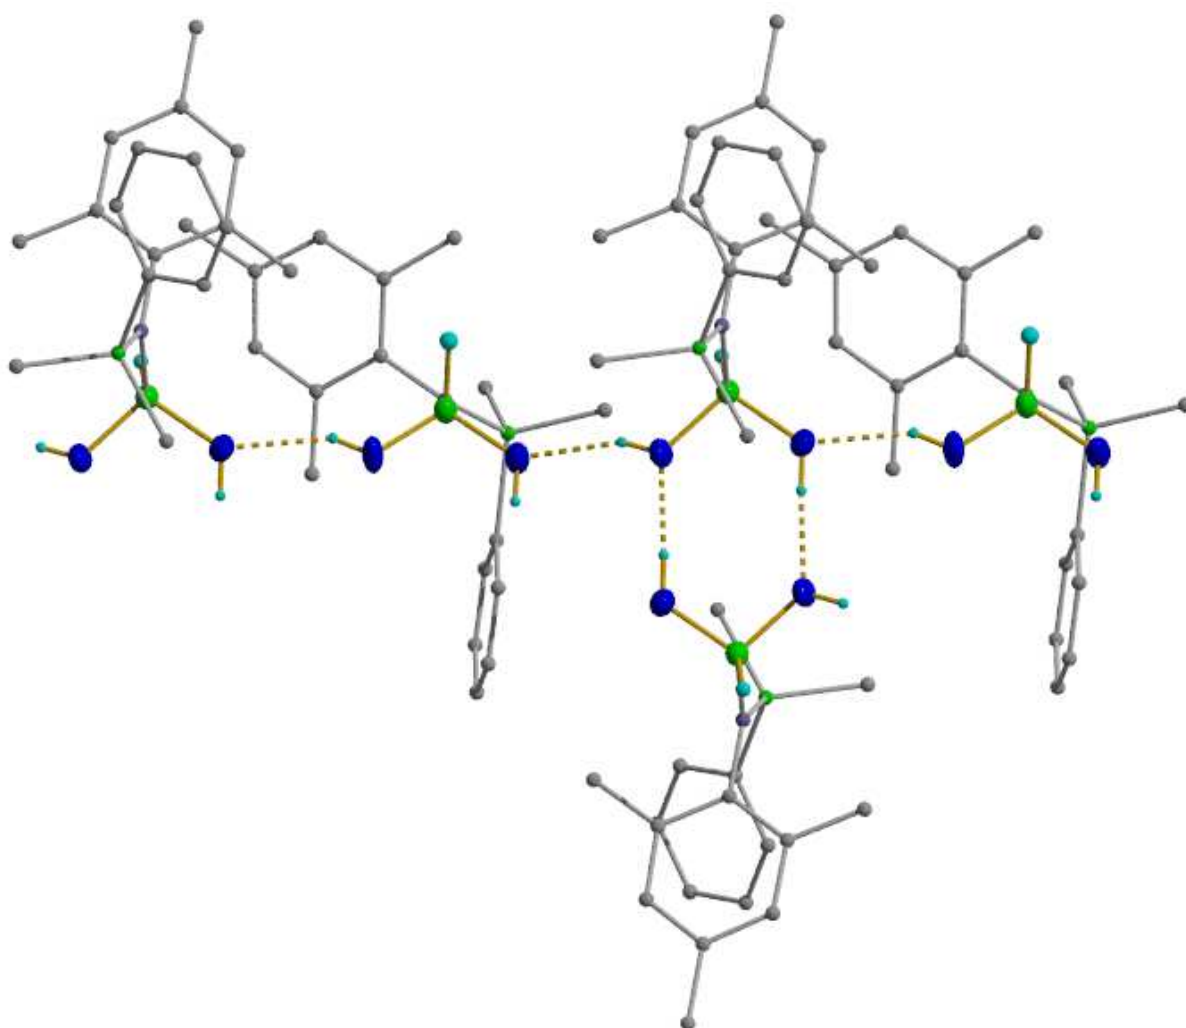

**Figure S2** X-ray crystal structure of **6** with intermolecular SiO–H···O(H)Si hydrogen bonding network (the separations of SiO–H···O(H)Si, 1.8519(2), 1.9688(1), and 2.0097(1) Å). H atoms except for those of SiH and OH are omitted for clarity.

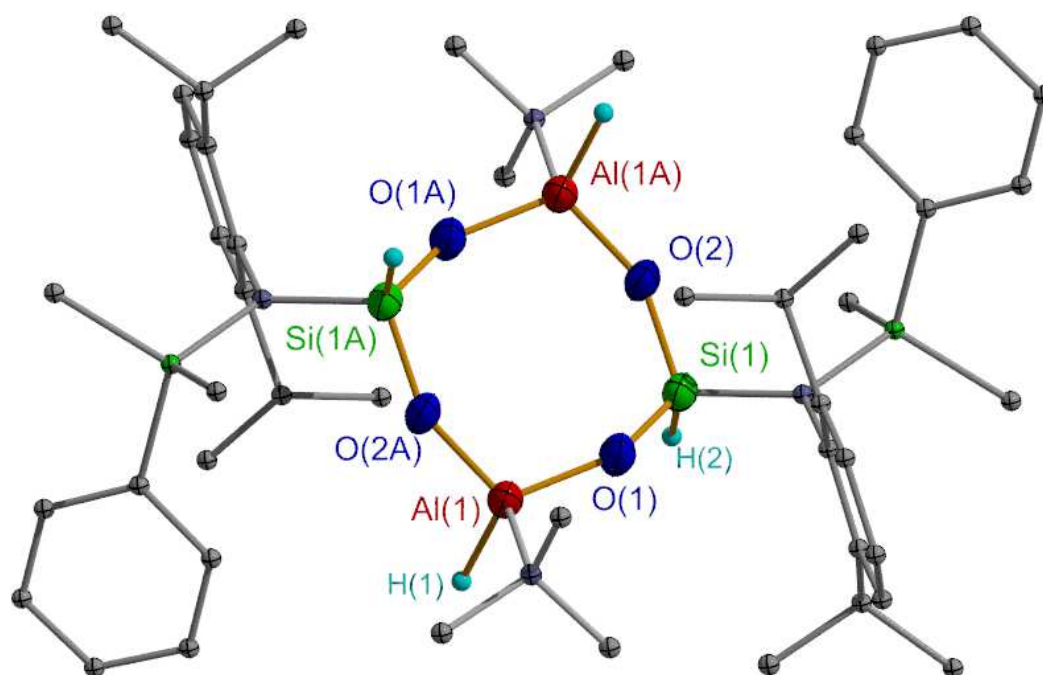

**Figure S3** X-ray crystal structure of **11** with NMe<sub>3</sub> bonded at the Al atom in thermal ellipsoids at 50% probability level. H atoms except for those of SiH and AlH are omitted for clarity. Selected bond lengths (Å): Al–N<sub>NMe<sub>3</sub></sub> 2.038(5). Symmetry code for A:  $-x, -y+2, -z$ .

## II. Table of selected bond lengths and angles of **8–11**

**Table S2** Important bond lengths (Å) and angles (°) of **8–11**

| Compound    | <b>8</b>          | <b>9</b>          | <b>10</b>         | <b>11</b>         |
|-------------|-------------------|-------------------|-------------------|-------------------|
| Si–H (Å)    | 1.44(2)           | 1.44(3)–1.45(3)   | 1.35(4)–1.42(4)   | 1.39(2)           |
| Si–O (Å)    | 1.597(1)–1.598(2) | 1.572(7)–1.631(8) | 1.599(3)–1.618(3) | 1.601(2)–1.606(1) |
| Al–O (Å)    | 1.712(1)–1.714(2) | 1.668(8)–1.769(8) | 1.707(3)–1.718(3) | 1.709(1)–1.714(1) |
| O–Si–O (°)  | 113.3(8)          | 112.1(4)–113.2(4) | 111.9(1)–113.8(1) | 112.6(8)          |
| O–Al–O (°)  | 115.7(5)          | 114.6(4)–114.8(4) | 112.0(1)–115.4(1) | 115.4(7)          |
| Si–O–Al (°) | 149.3(1)–151.0(1) | 145.9(5)–158.3(5) | 128.9(2)–145.3(2) | 145.7(1)–147.7(1) |

III. The  $^1\text{H}$ ,  $^{13}\text{C}$ , and  $^{29}\text{Si}$  NMR Spectra of **1-11**

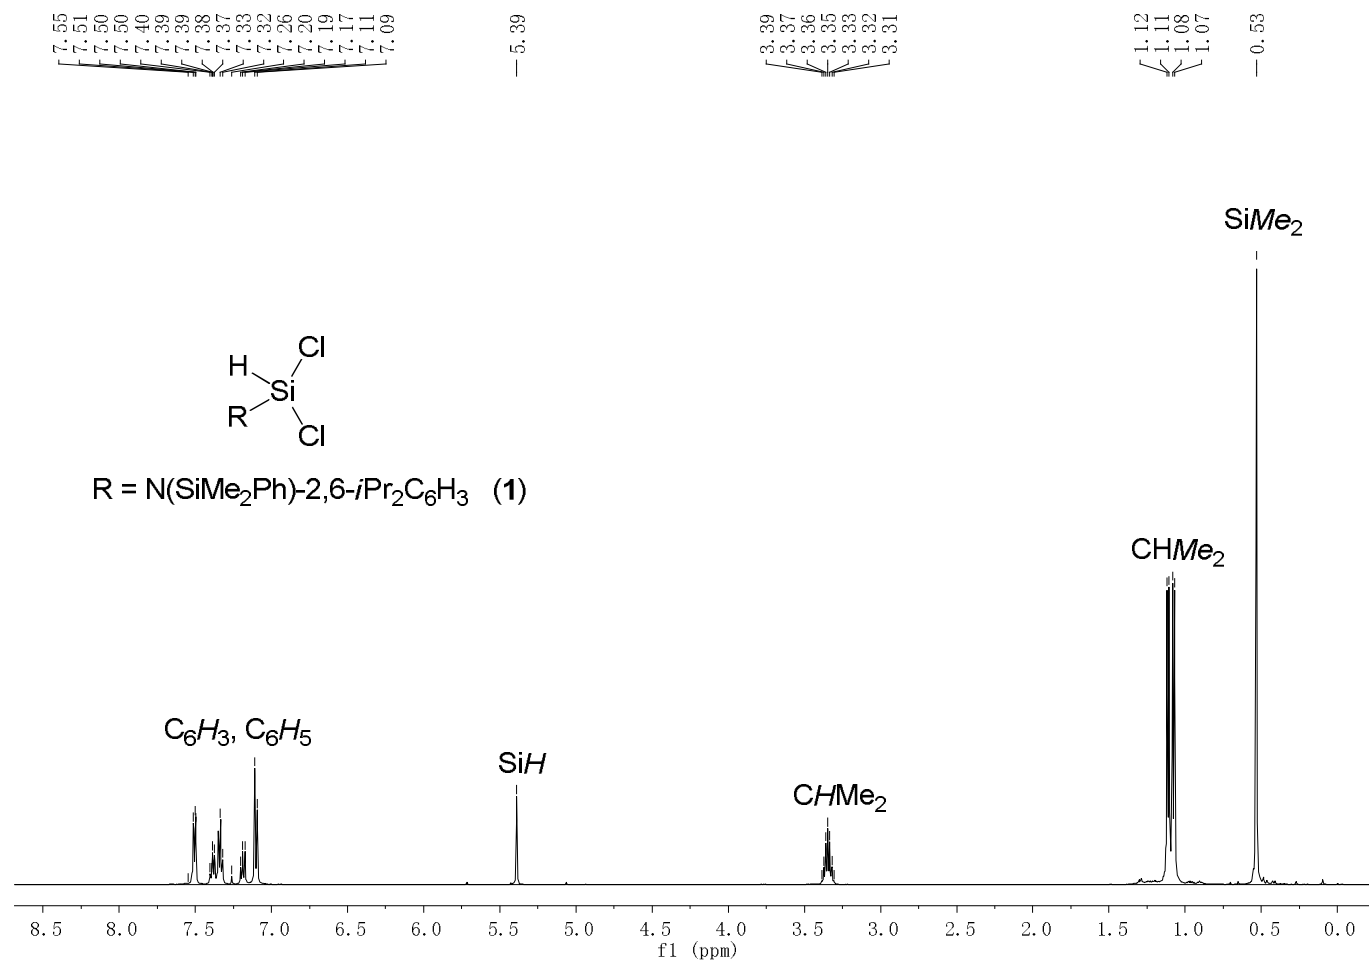

Figure S4-1  $^1\text{H}$  NMR spectrum of **1** in  $\text{CDCl}_3$

— 147.8  
 / 137.4  
 \ 136.3  
 / 134.7  
 \ 130.0  
 / 127.9  
 \ 126.8  
 / 124.4

/ 77.4  
 \ 77.2  
 / 76.9

/ 28.3  
 \ 26.3  
 / 23.6

— -0.1

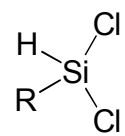

R = N(SiMe<sub>2</sub>Ph)-2,6-*i*Pr<sub>2</sub>C<sub>6</sub>H<sub>3</sub> (**1**)

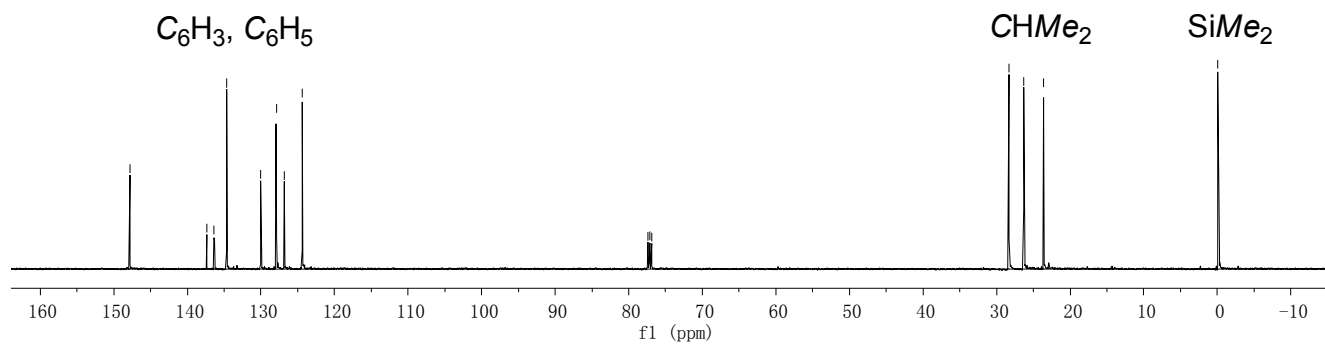

Figure S4-2 <sup>13</sup>C NMR spectrum of **1** in CDCl<sub>3</sub>

— 1.2

— -21.5

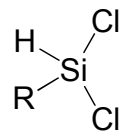

R = N(SiMe<sub>2</sub>Ph)-2,6-*i*Pr<sub>2</sub>C<sub>6</sub>H<sub>3</sub> (**1**)

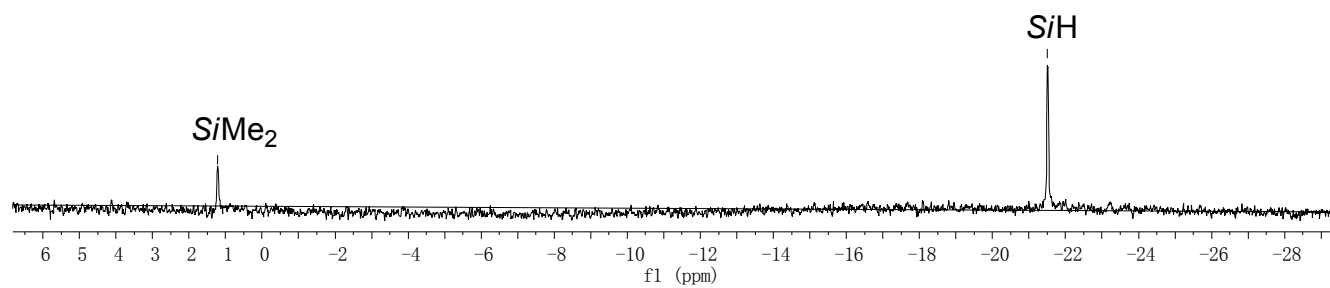

Figure S4-3 <sup>29</sup>Si NMR spectrum of **1** in CDCl<sub>3</sub>



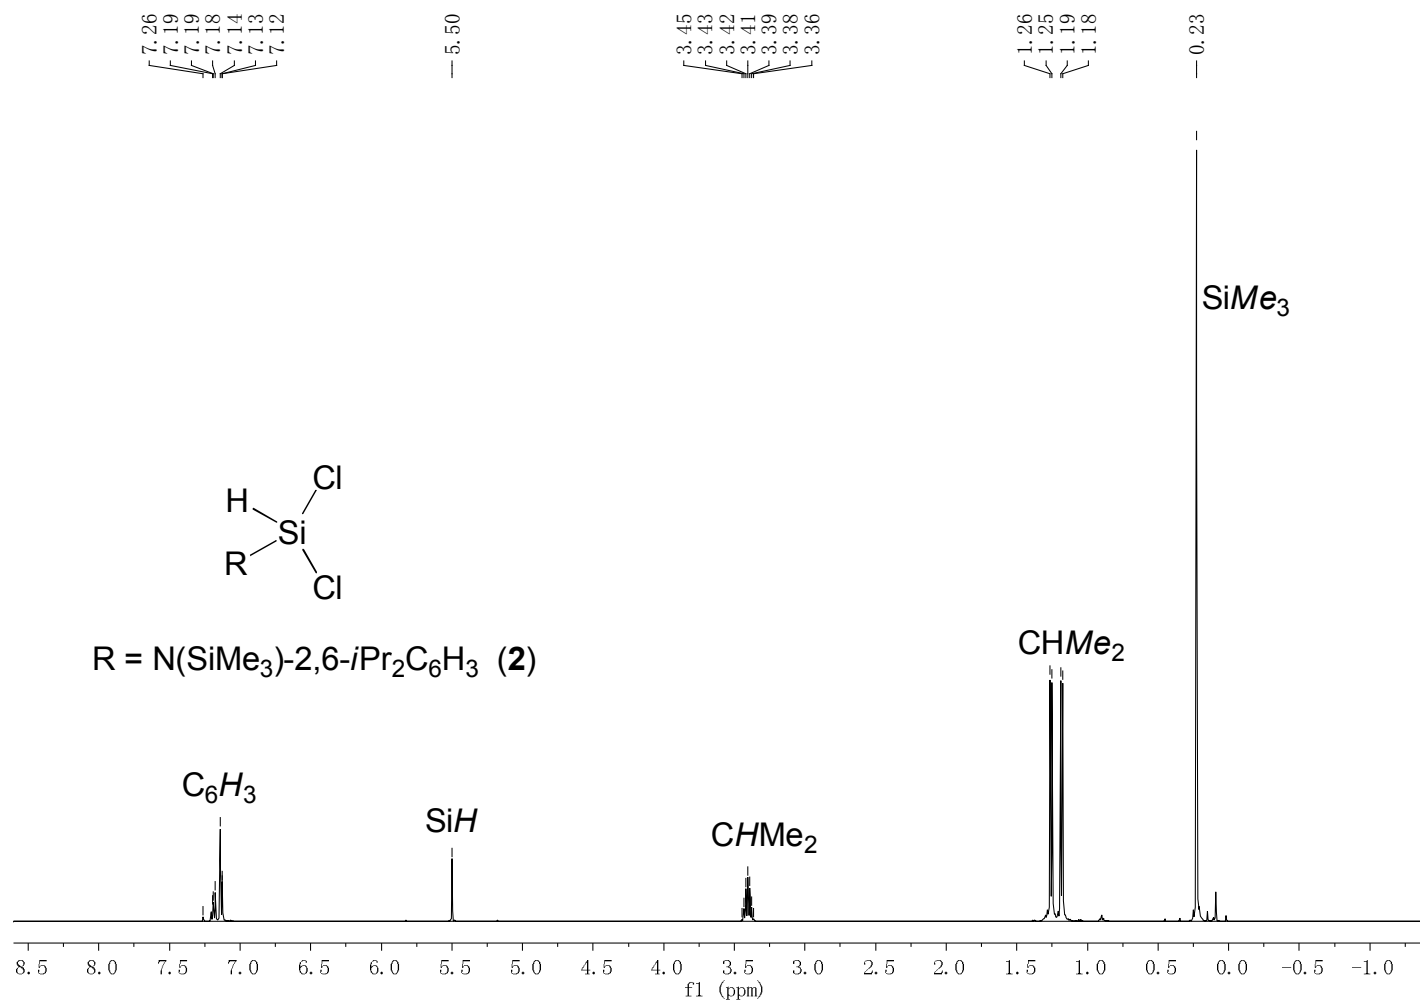

Figure S5-1  $^1\text{H}$  NMR spectrum of **2** in  $\text{CDCl}_3$

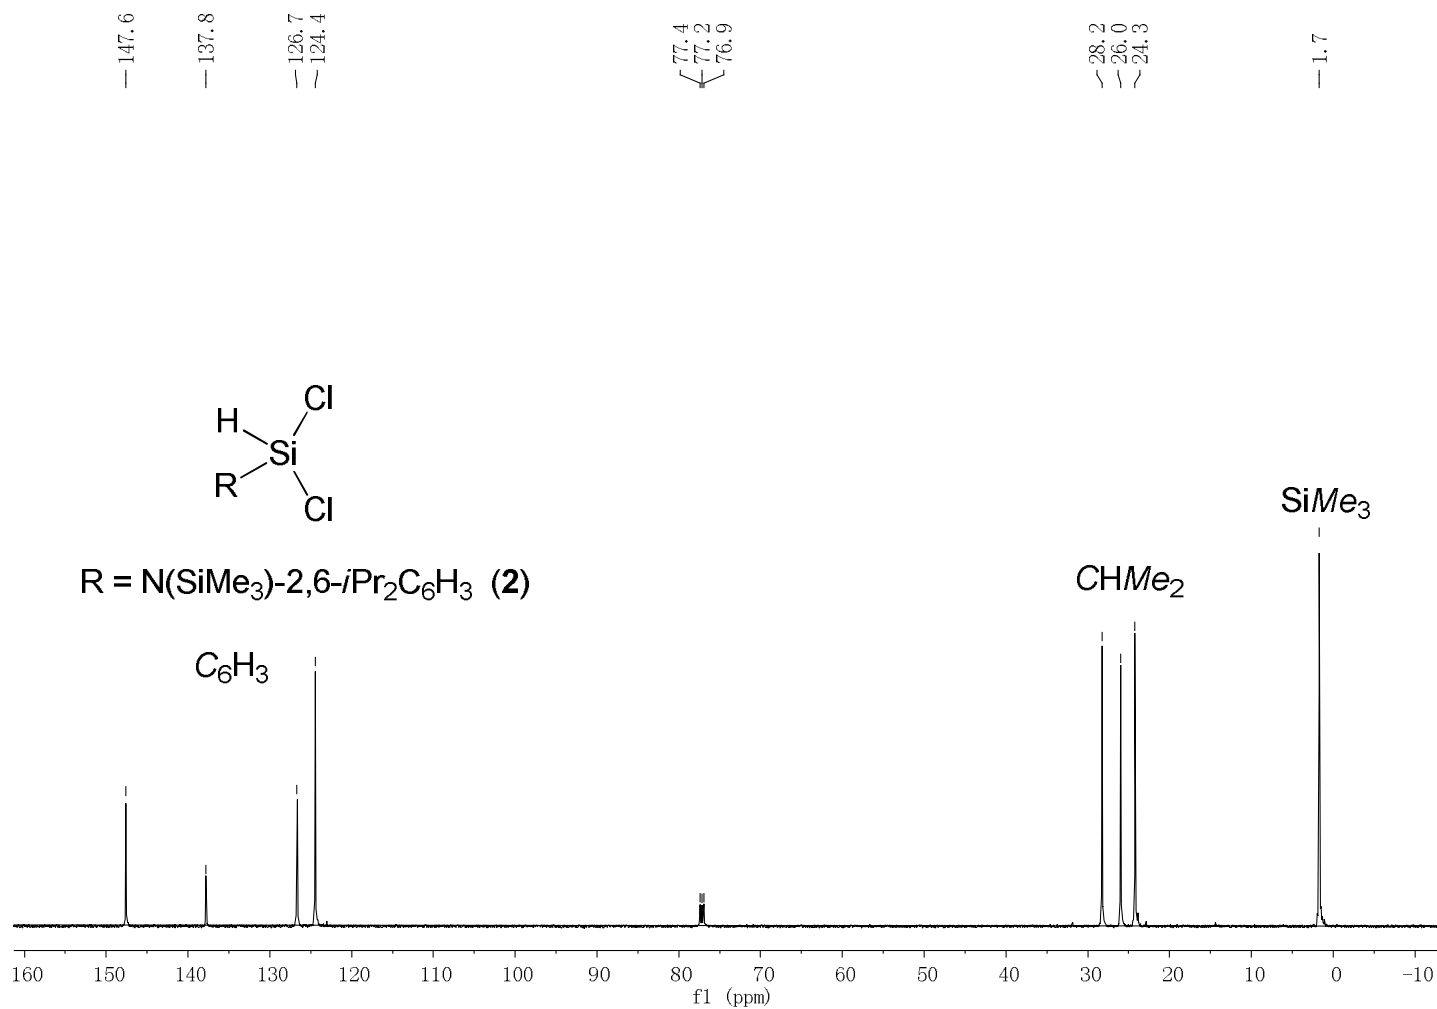

Figure S5-2  $^{13}\text{C}$  NMR spectrum of **2** in  $\text{CDCl}_3$

-11.2

-22.0

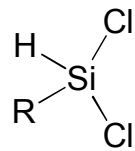

R = N(SiMe<sub>3</sub>)-2,6-*i*Pr<sub>2</sub>C<sub>6</sub>H<sub>3</sub> (**2**)

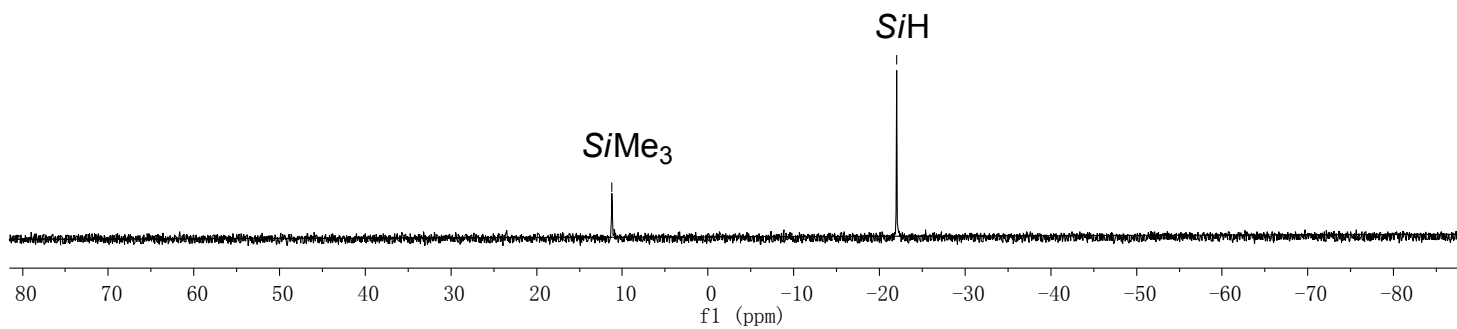

Figure S5-3 <sup>29</sup>Si NMR spectrum of **2** in CDCl<sub>3</sub>

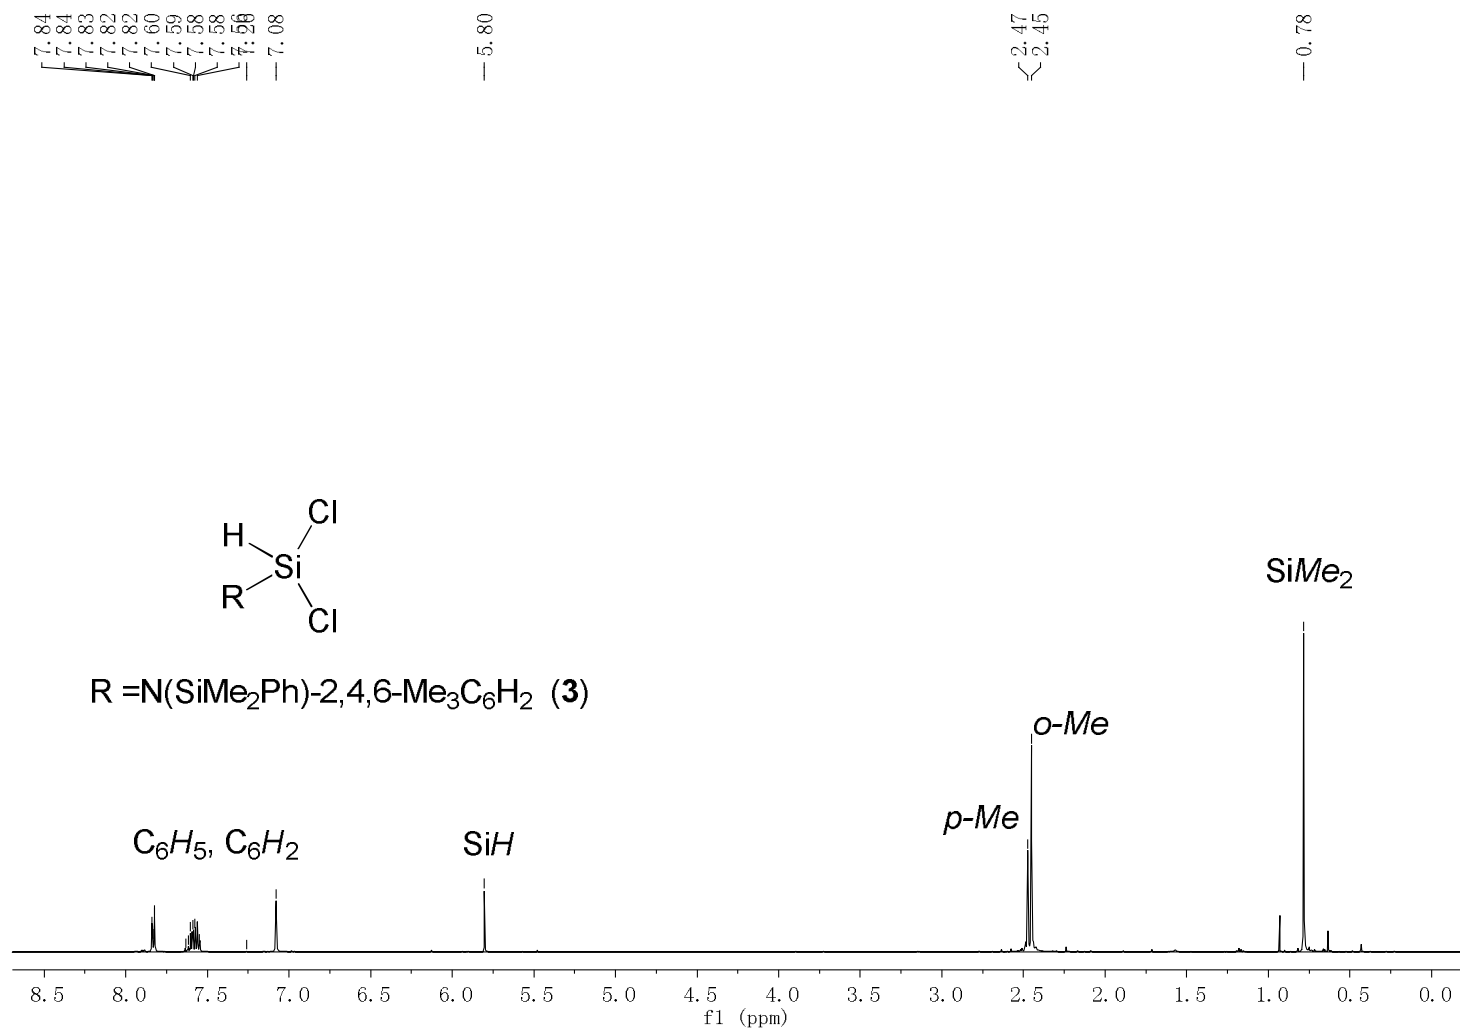

Figure S6-1  $^1\text{H}$  NMR spectrum of **3** in  $\text{CDCl}_3$

137.5  
137.1  
137.0  
135.3  
134.6  
130.1  
130.0  
128.3  
128.1  
128.0  
127.8

20.8  
20.3

-0.3

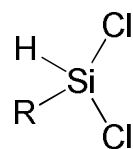

R = N(SiMe<sub>2</sub>Ph)-2,4,6-Me<sub>3</sub>C<sub>6</sub>H<sub>2</sub> (**3**)

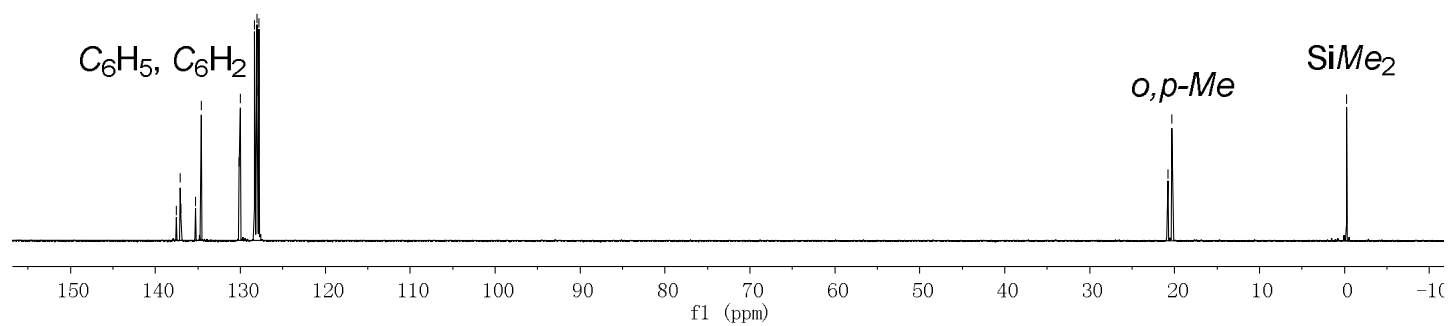

Figure S6-2 <sup>13</sup>C NMR spectrum of **3** in C<sub>6</sub>D<sub>6</sub>

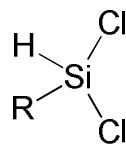

R = N(SiMe<sub>2</sub>Ph)-2,4,6-Me<sub>3</sub>C<sub>6</sub>H<sub>2</sub> (**3**)

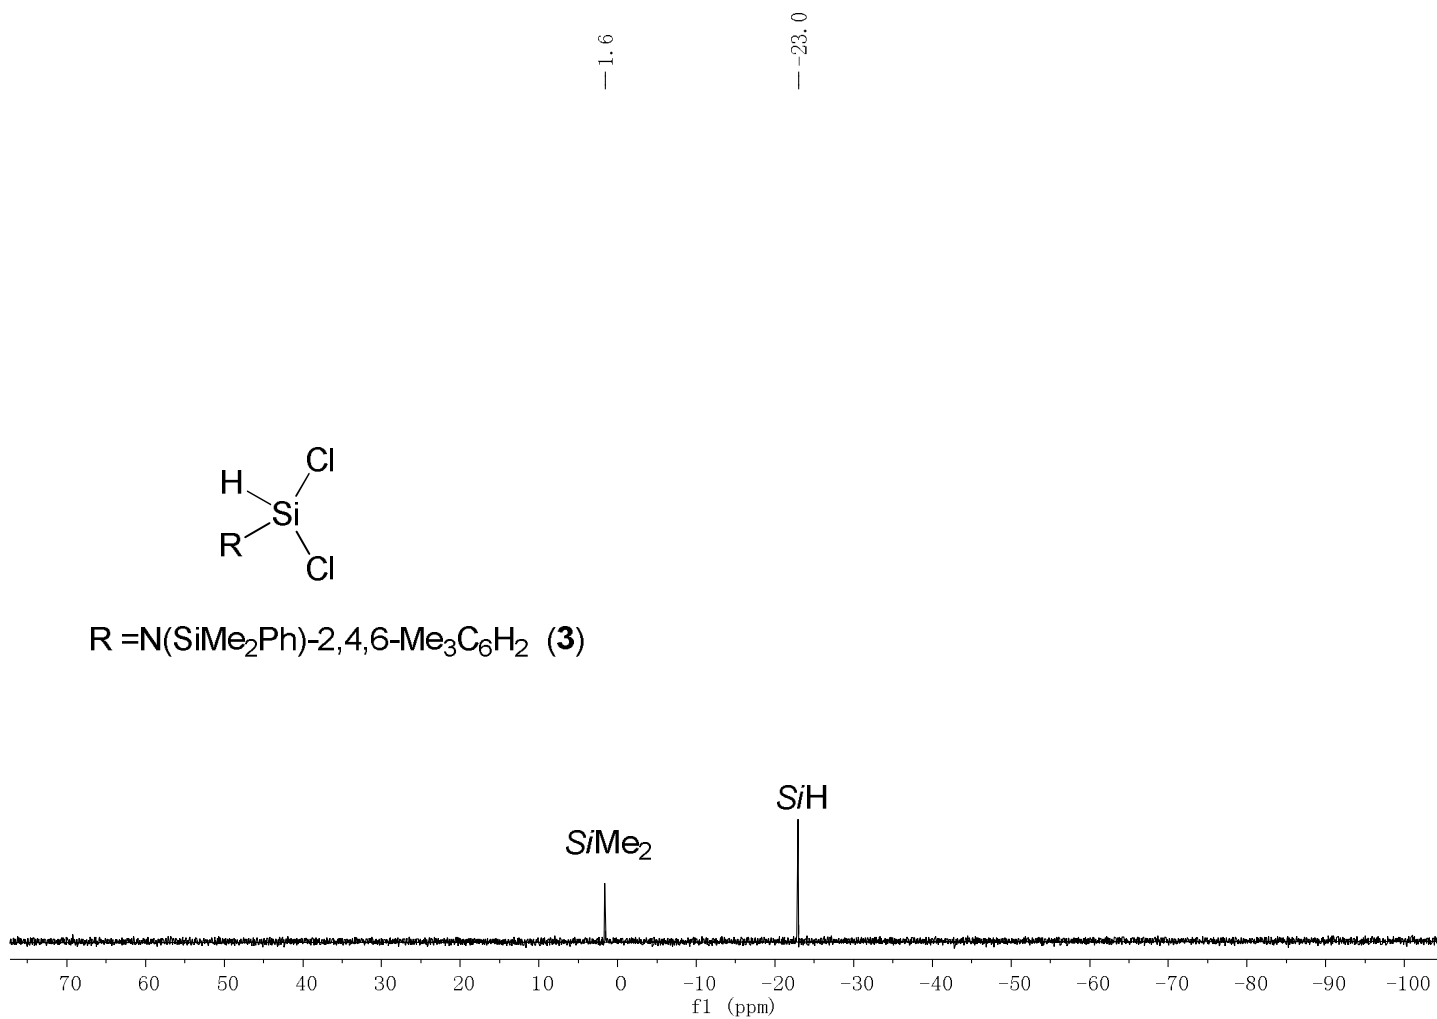

Figure S6-3 <sup>29</sup>Si NMR spectrum of **3** in CDCl<sub>3</sub>

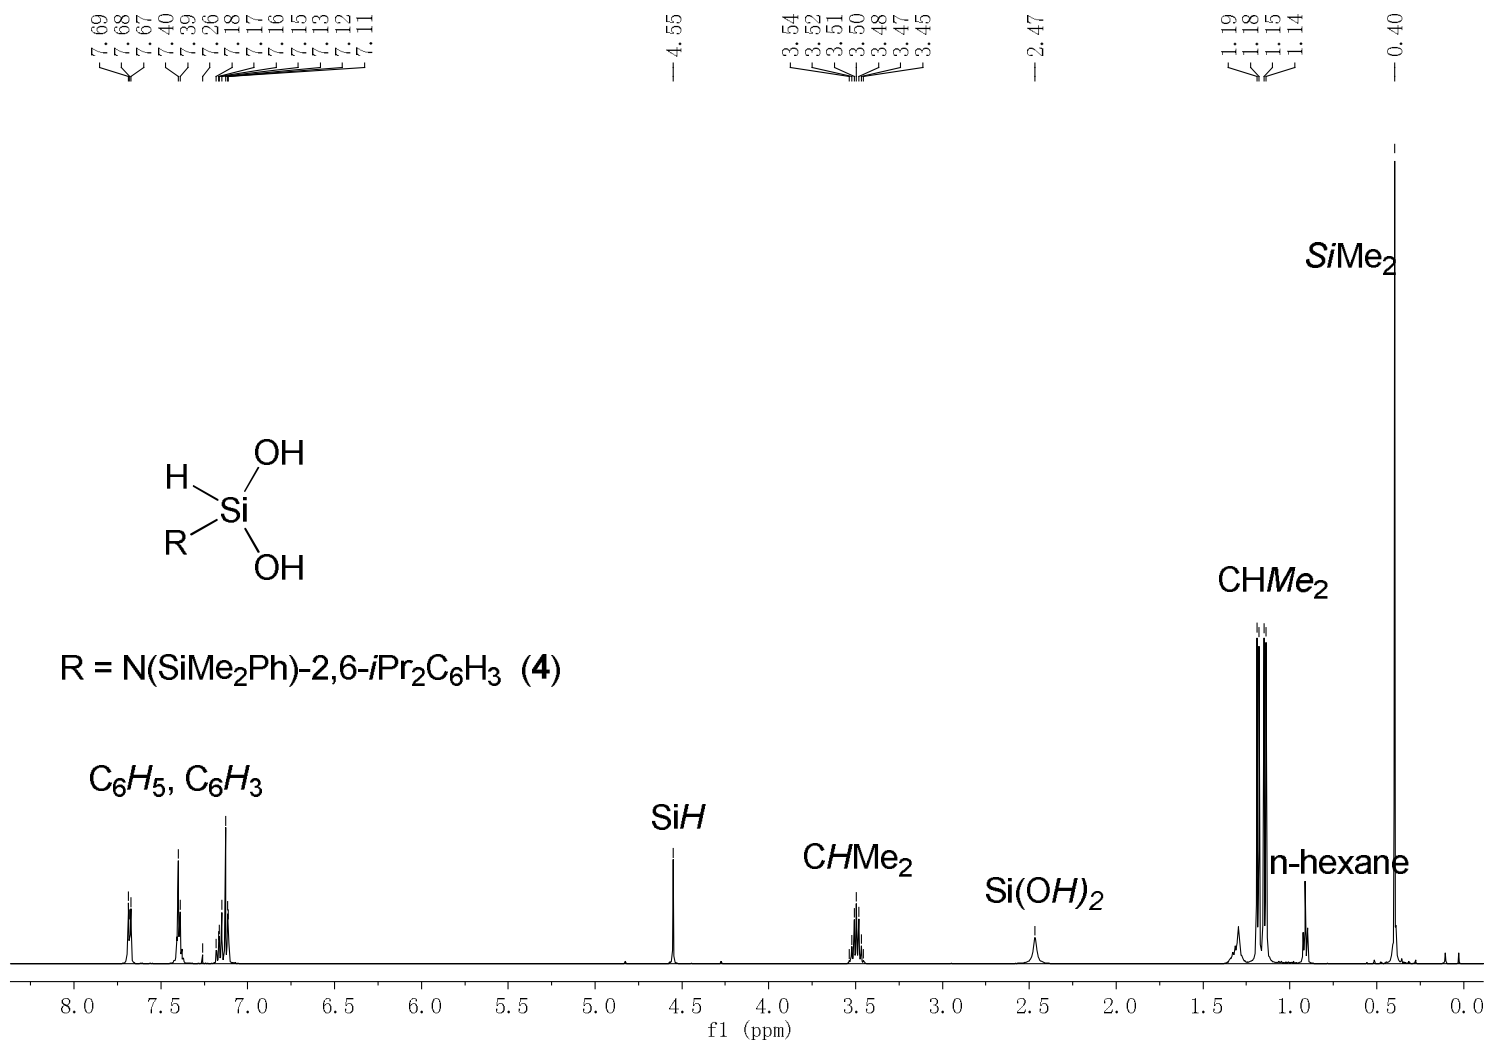

Figure S7-1  $^1\text{H}$  NMR spectrum of **4** in  $\text{CDCl}_3$

— 147.8  
 — 139.1  
 — 137.8  
 — 134.3  
 — 129.7  
 — 128.0  
 — 125.7  
 — 124.1

— 77.2

— 28.1  
 — 25.6  
 — 24.1

— -0.5

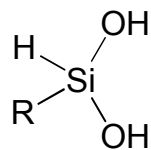

R = N(SiMe<sub>2</sub>Ph)-2,6-*i*Pr<sub>2</sub>C<sub>6</sub>H<sub>3</sub> (**4**)

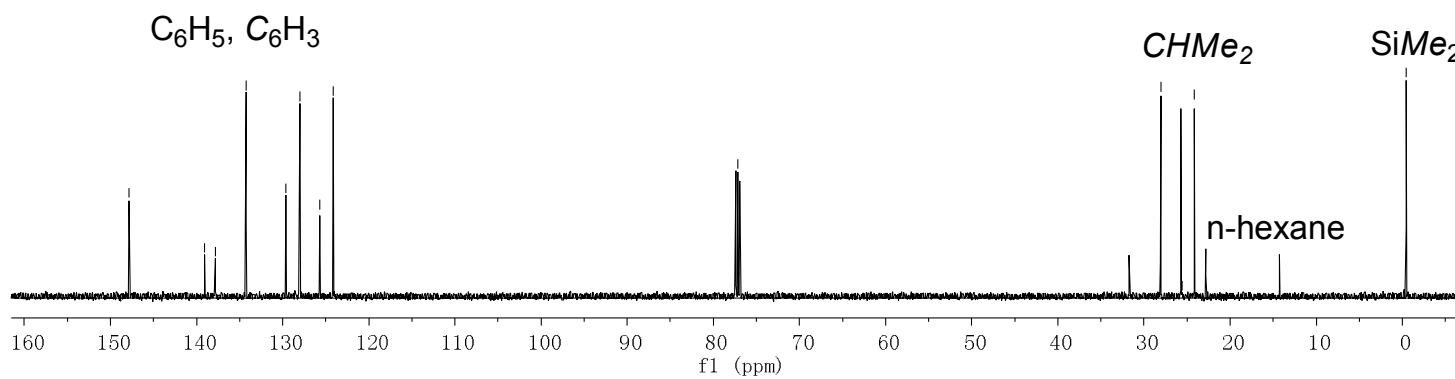

Figure S7-2 <sup>13</sup>C NMR spectrum of **4** in CDCl<sub>3</sub>



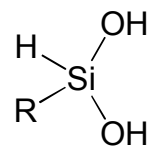

R = N(SiMe<sub>2</sub>Ph)-2,6-*i*Pr<sub>2</sub>C<sub>6</sub>H<sub>3</sub> (**4**)

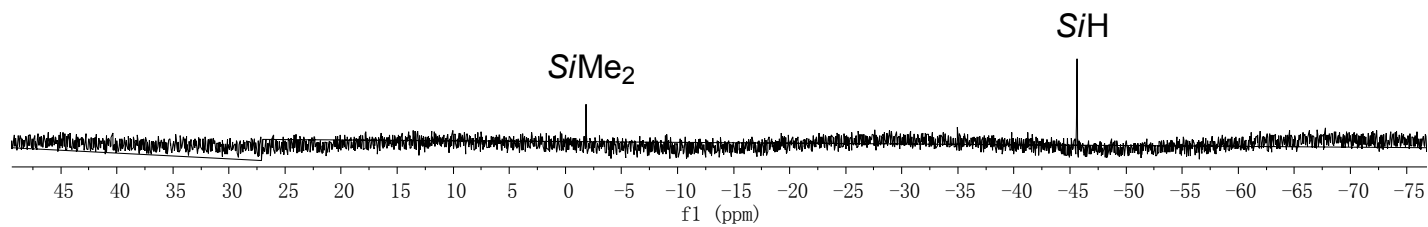

Figure S7-3 <sup>29</sup>Si NMR spectrum of **4** in CDCl<sub>3</sub>

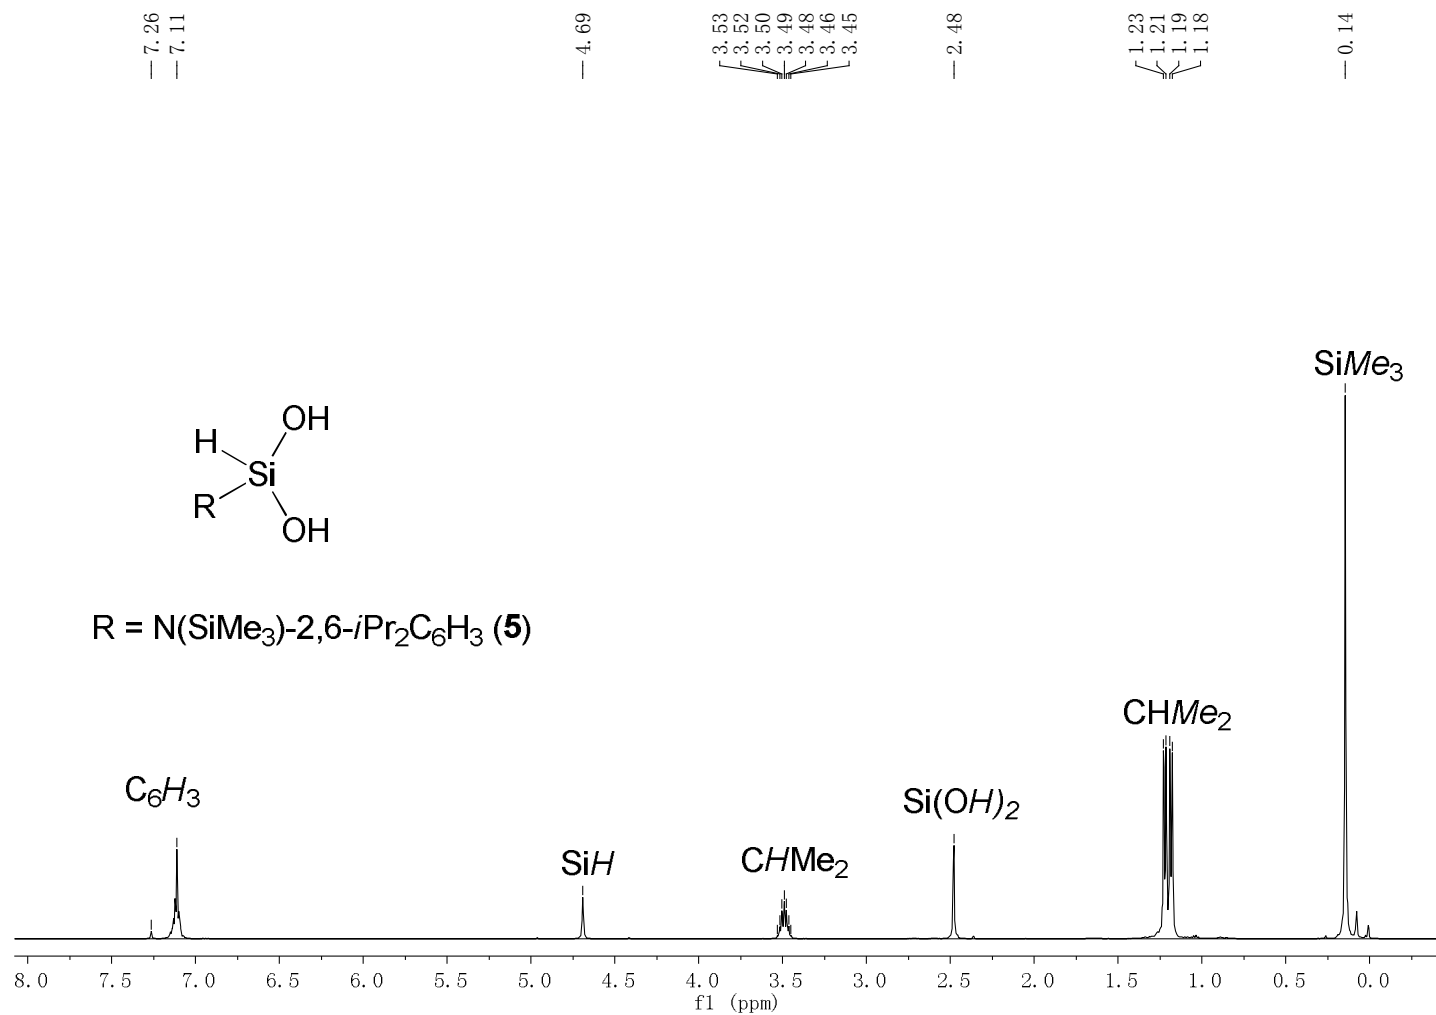

**Figure S8-1** <sup>1</sup>H NMR spectrum of **5** in CDCl<sub>3</sub>

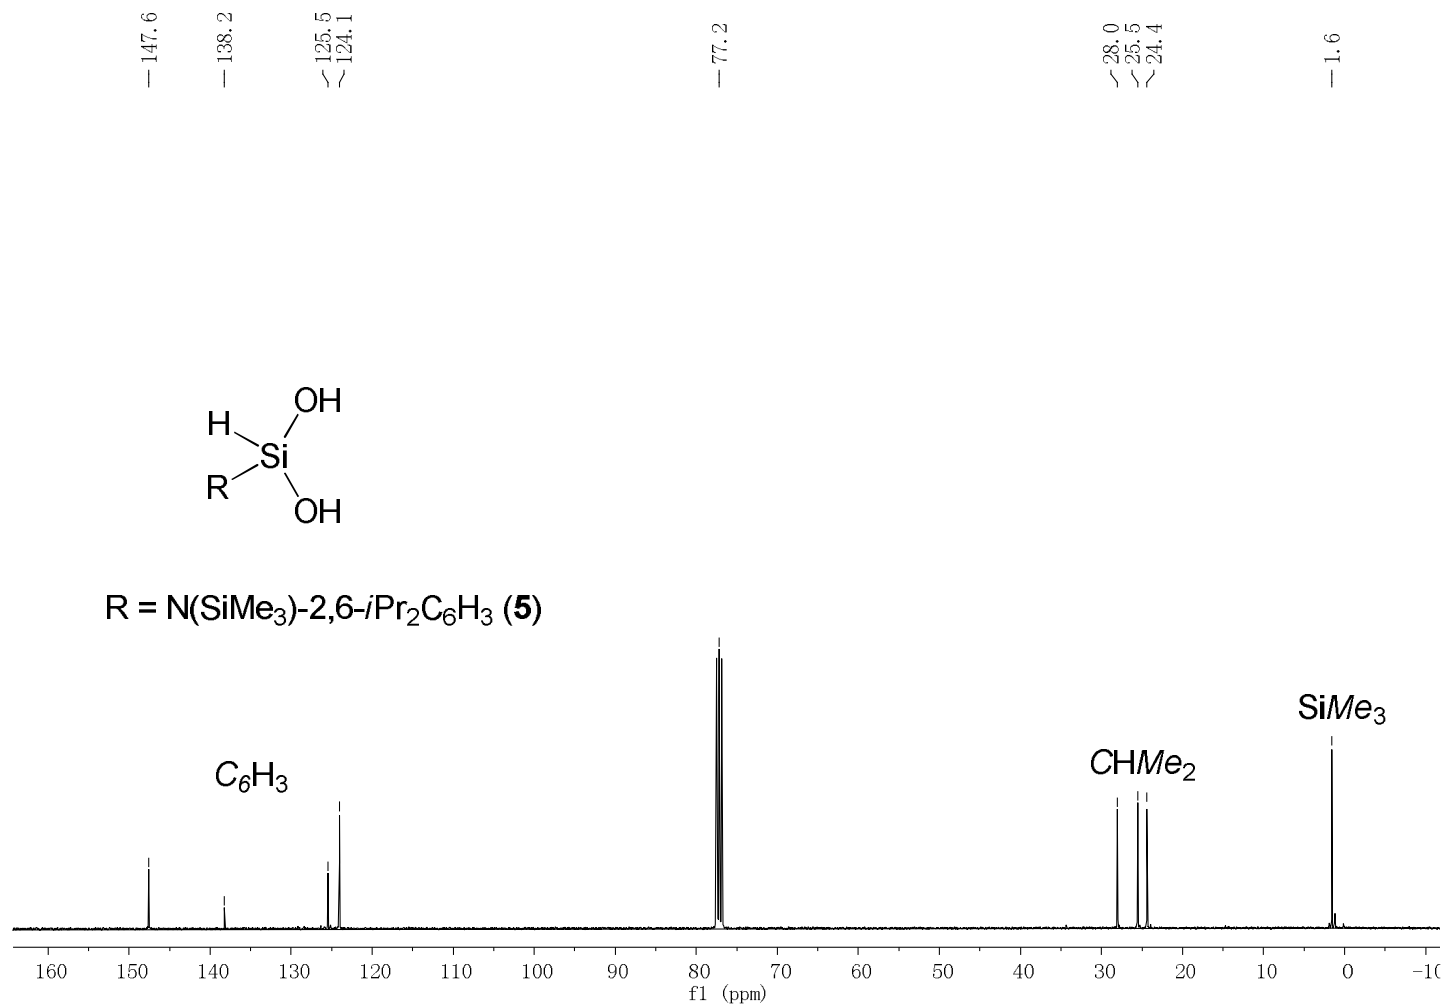

Figure S8-2  $^{13}\text{C}$  NMR spectrum of **5** in  $\text{CDCl}_3$

-7.1

-46.4

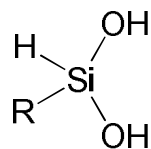

R = N(SiMe<sub>3</sub>)-2,6-*i*Pr<sub>2</sub>C<sub>6</sub>H<sub>3</sub> (**5**)

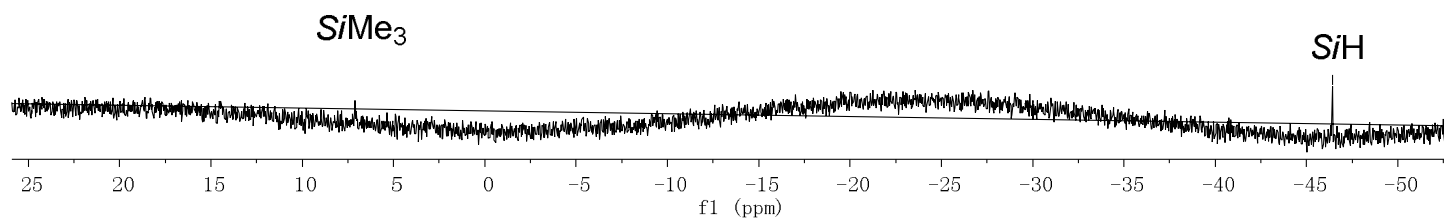

Figure S8-3 <sup>29</sup>Si NMR spectrum of **5** in CDCl<sub>3</sub>

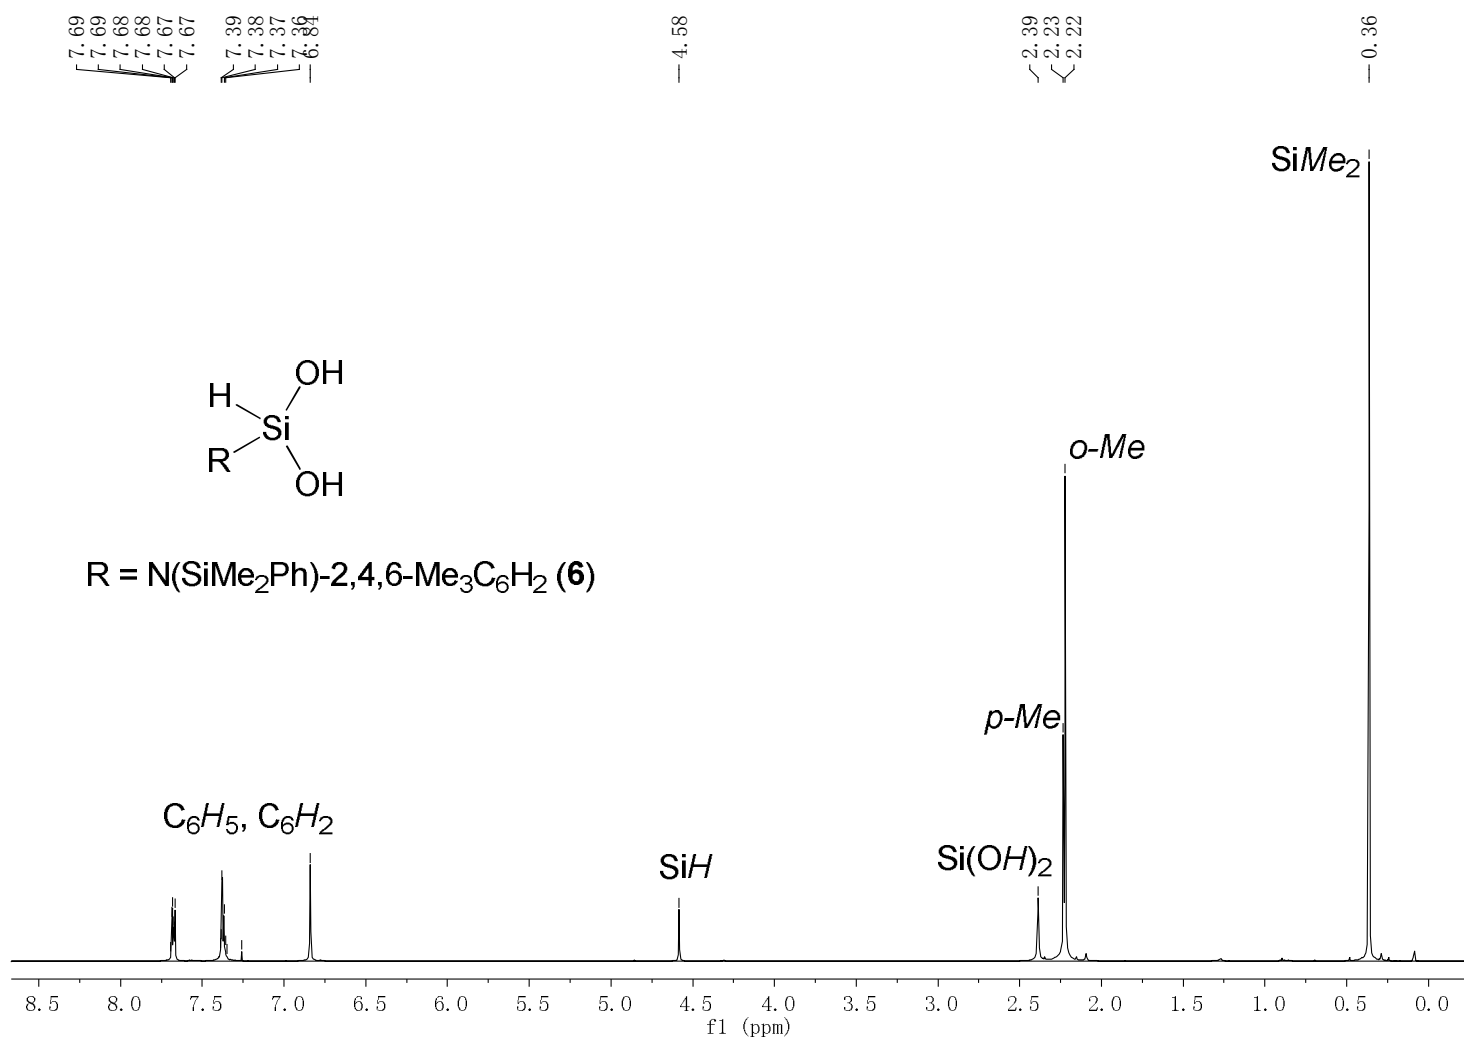

Figure S9-1 <sup>1</sup>H NMR spectrum of **6** in CDCl<sub>3</sub>

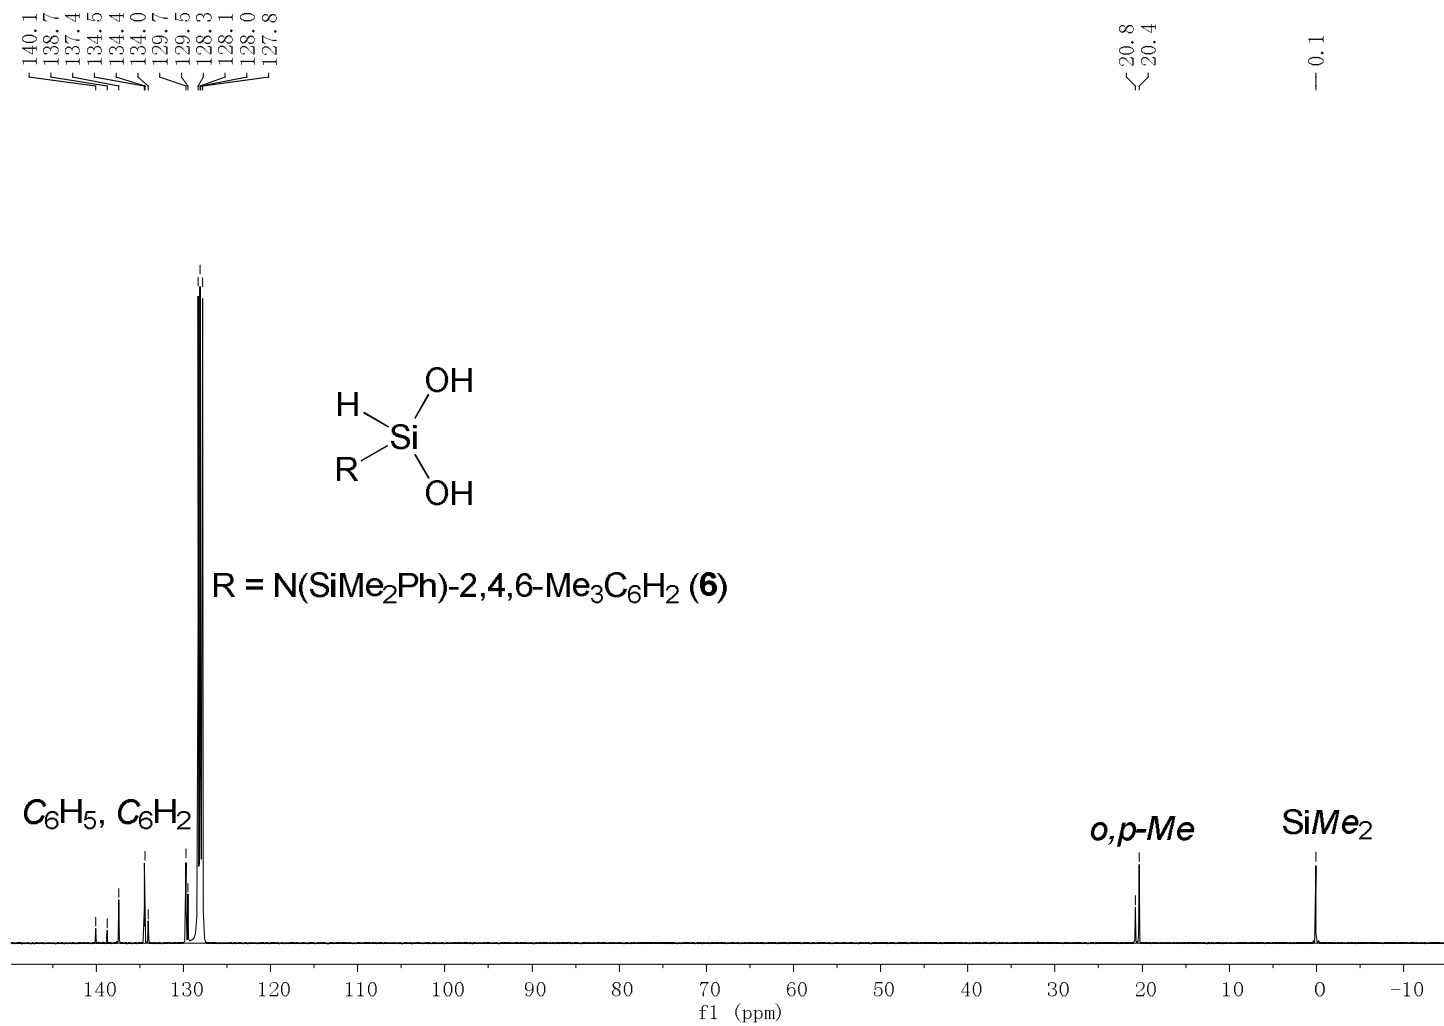

Figure S9-2  $^{13}\text{C}$  NMR spectrum of **6** in  $\text{C}_6\text{D}_6$

--1.7

--47.2

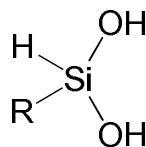

R = N(SiMe<sub>2</sub>Ph)-2,4,6-Me<sub>3</sub>C<sub>6</sub>H<sub>2</sub> (**6**)

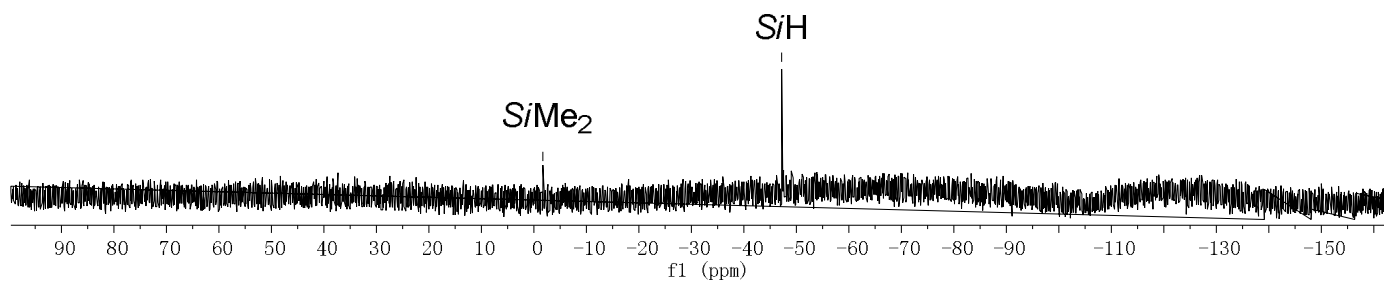

Figure S9-3 <sup>29</sup>Si NMR spectrum of **6** in CDCl<sub>3</sub>

7.61  
7.60  
7.26  
7.24  
6.97

4.55

3.64  
3.44

1.74

1.11  
1.10  
1.05  
1.04

0.29

1.00  
1.00

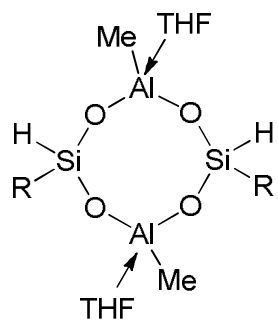

R = N(SiMe<sub>2</sub>Ph)-2,6-*i*Pr<sub>2</sub>C<sub>6</sub>H<sub>3</sub> (7)

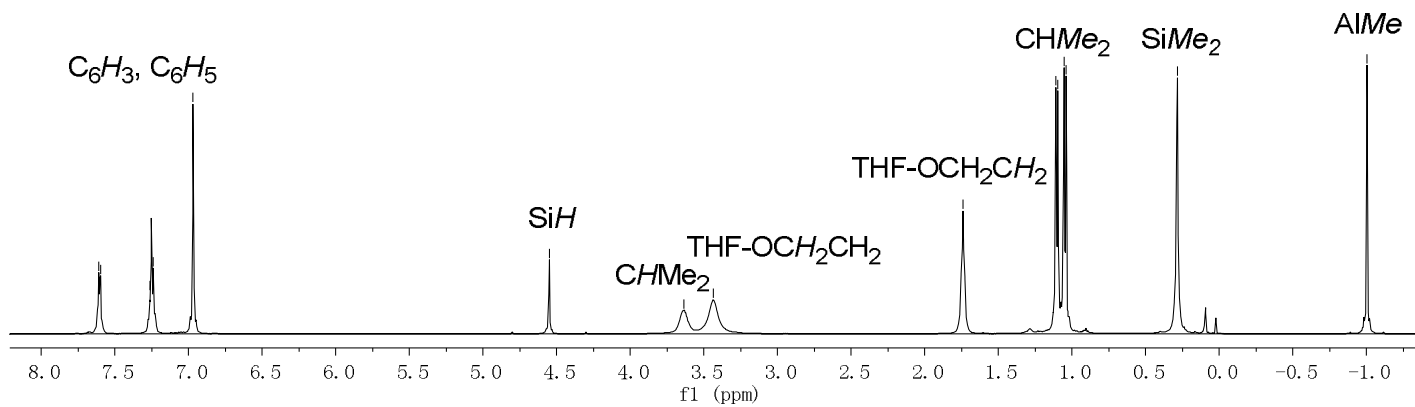

Figure S10-1 <sup>1</sup>H NMR spectrum of 7 in CDCl<sub>3</sub>



~ 148.2  
 / 142.3  
 \ 141.1  
 - 134.7  
 / 128.4  
 \ 127.1  
 / 123.6  
 \ 123.1

- 77.2  
 - 70.3

/ 27.9  
 \ 25.9  
 / 25.2  
 \ 24.0

- 0.1

- 14.0

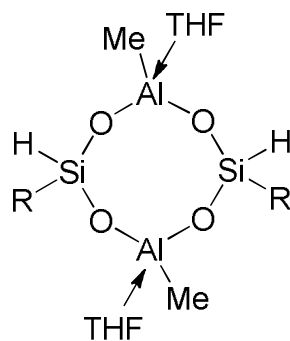

R = N(SiMe<sub>2</sub>Ph)-2,6-*i*Pr<sub>2</sub>C<sub>6</sub>H<sub>3</sub> (**7**)

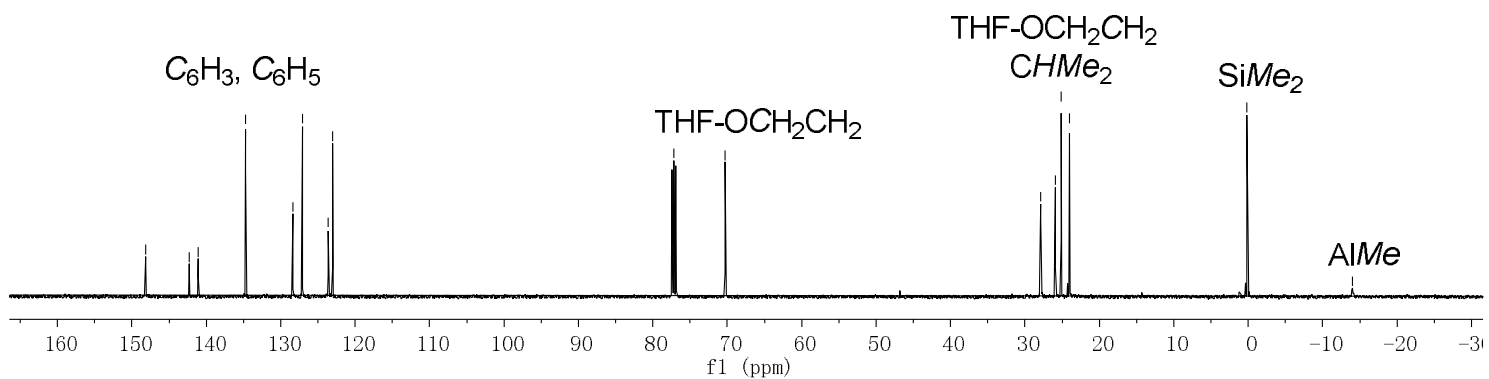

Figure S10-2 <sup>13</sup>C NMR spectrum of **7** in CDCl<sub>3</sub>

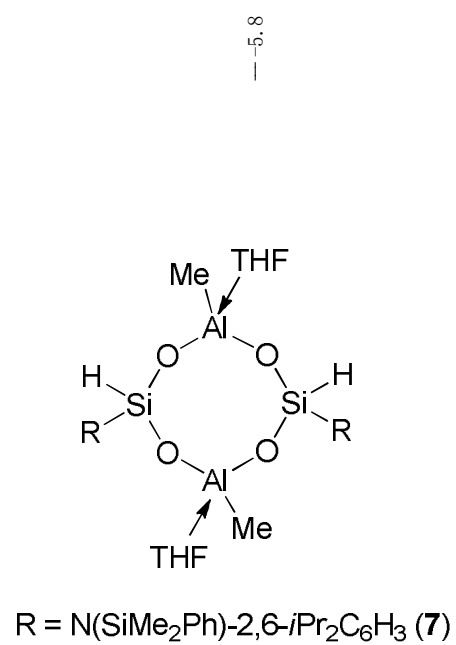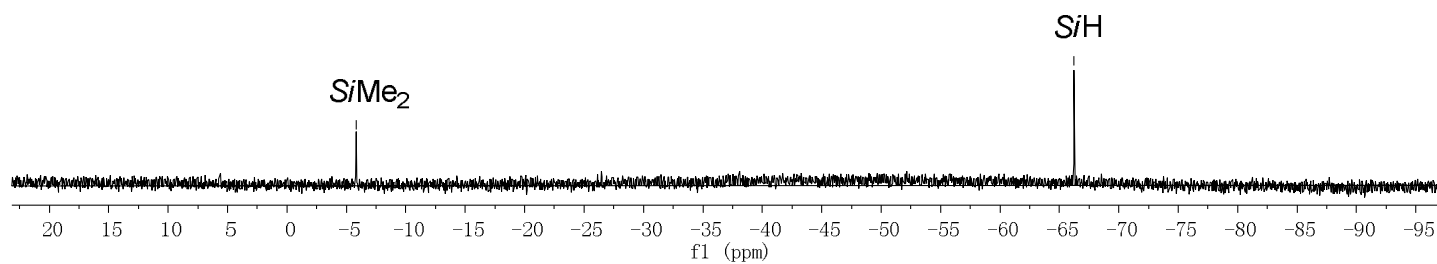

Figure S10-3 <sup>29</sup>Si NMR spectrum of **7** in CDCl<sub>3</sub>

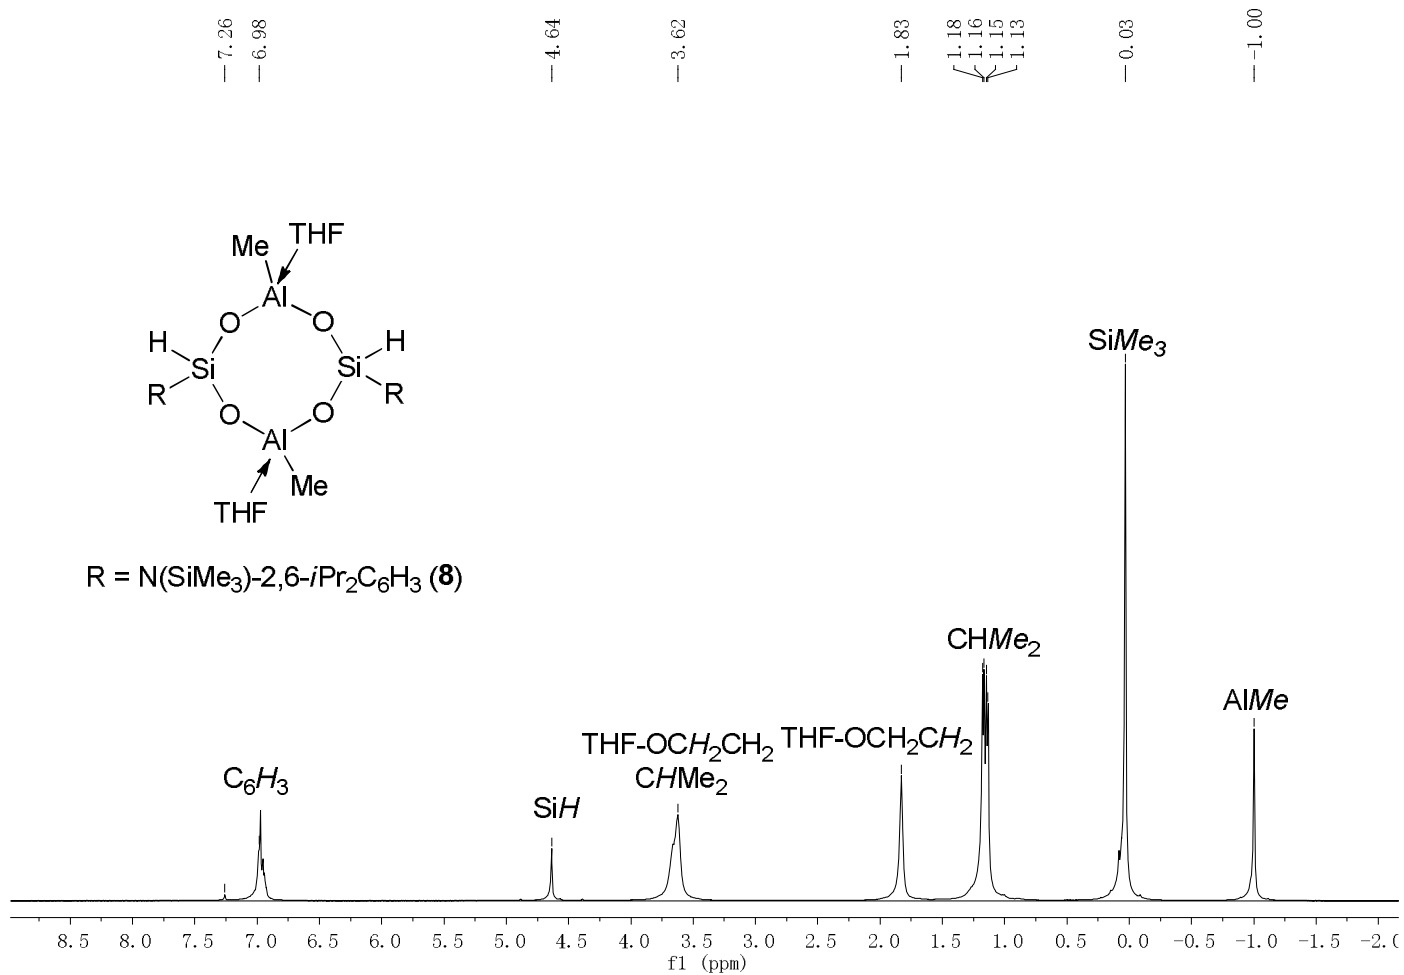

Figure S11-1  $^1\text{H}$  NMR spectrum of **8** in  $\text{CDCl}_3$

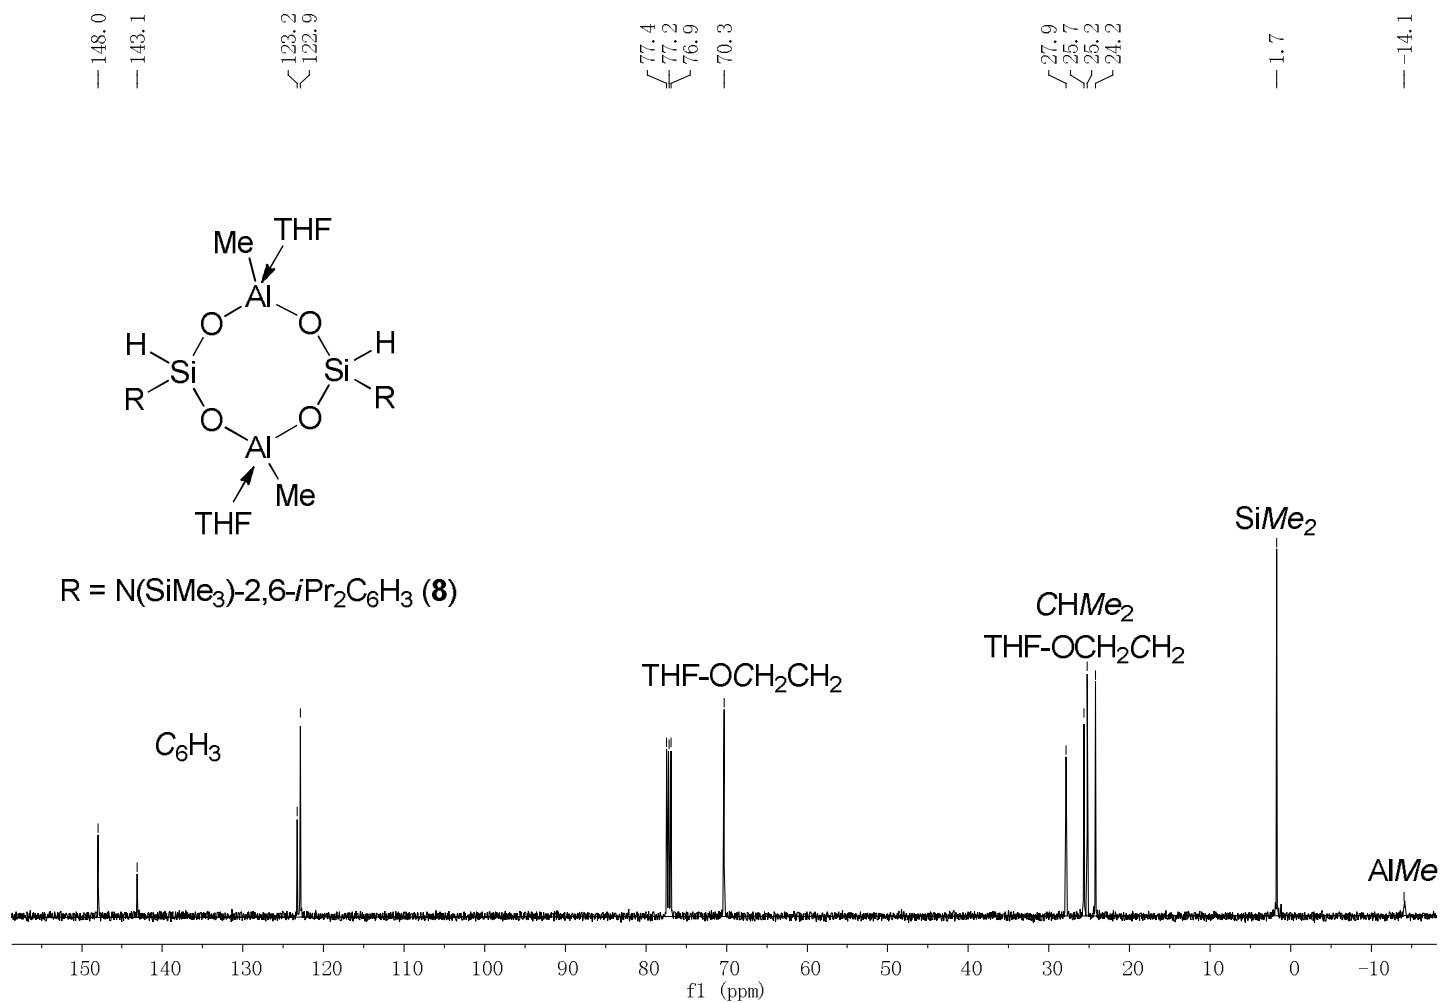

Figure S11-2 <sup>13</sup>C NMR spectrum of **8** in CDCl<sub>3</sub>

— 2.5

— 66.5

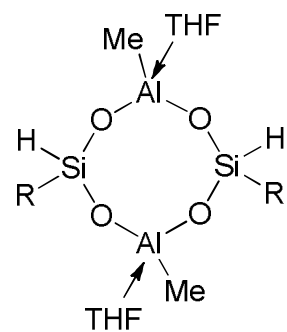

R = N(SiMe<sub>3</sub>)-2,6-iPr<sub>2</sub>C<sub>6</sub>H<sub>3</sub> (**8**)

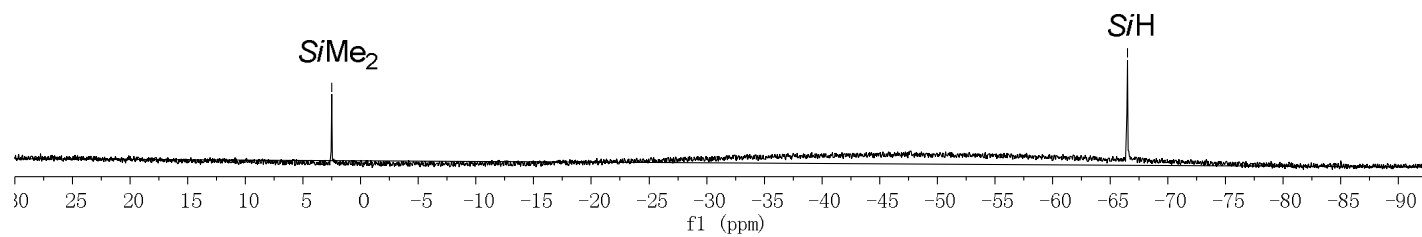

Figure S11-3 <sup>29</sup>Si NMR spectrum of **8** in CDCl<sub>3</sub>

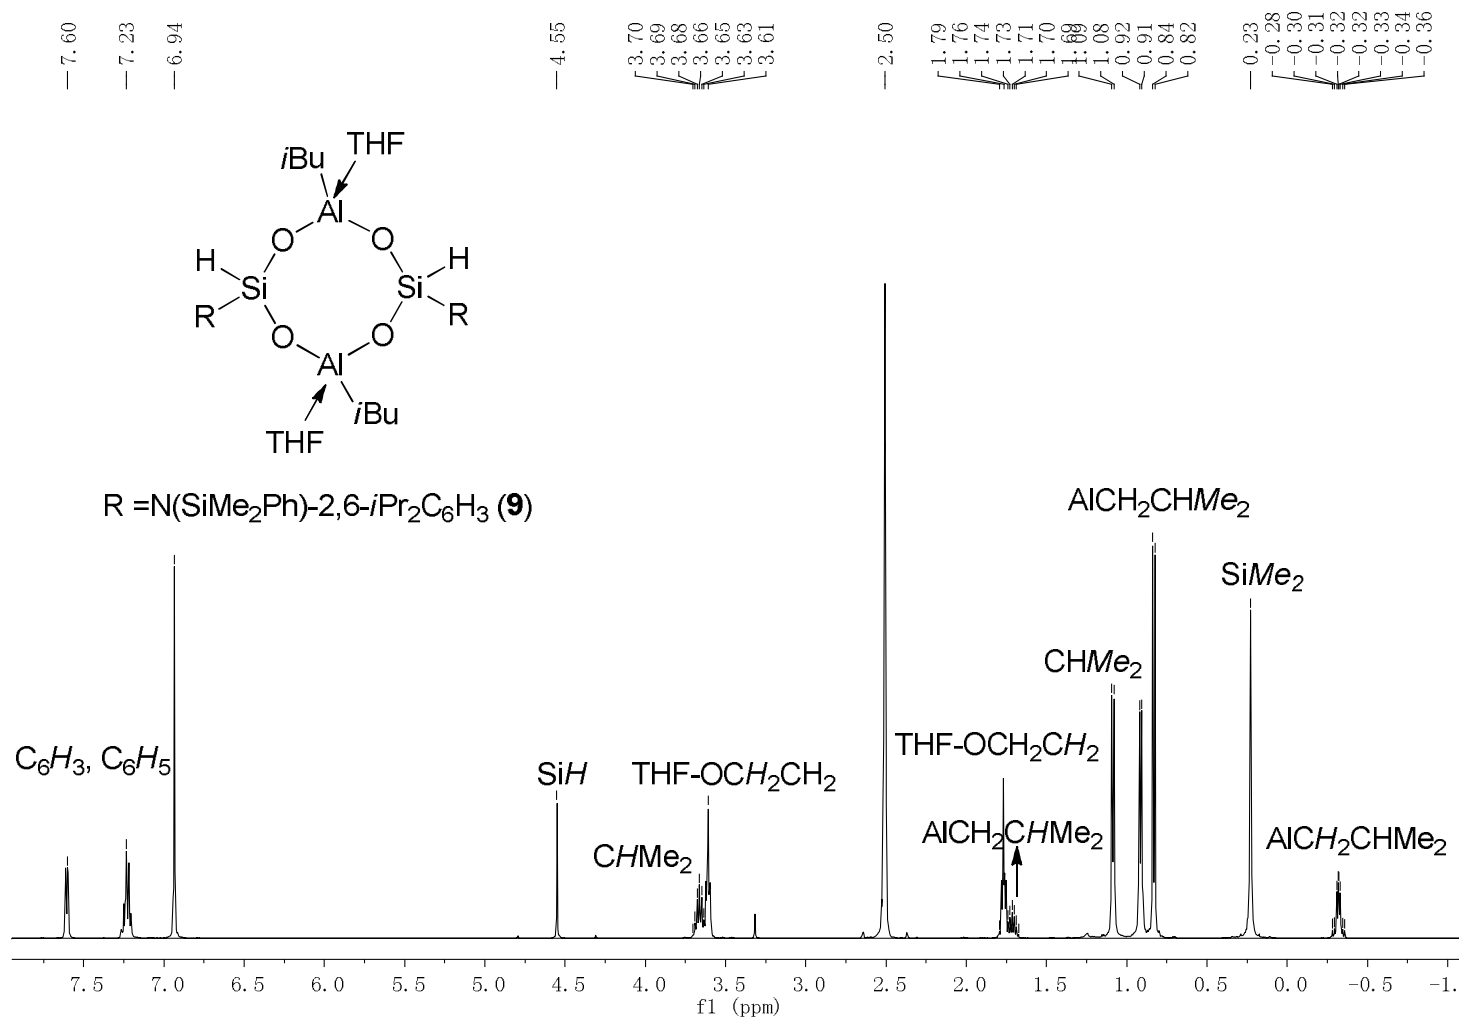

Figure S12-1  $^1\text{H}$  NMR spectrum of **9** in  $d^6$ -DMSO

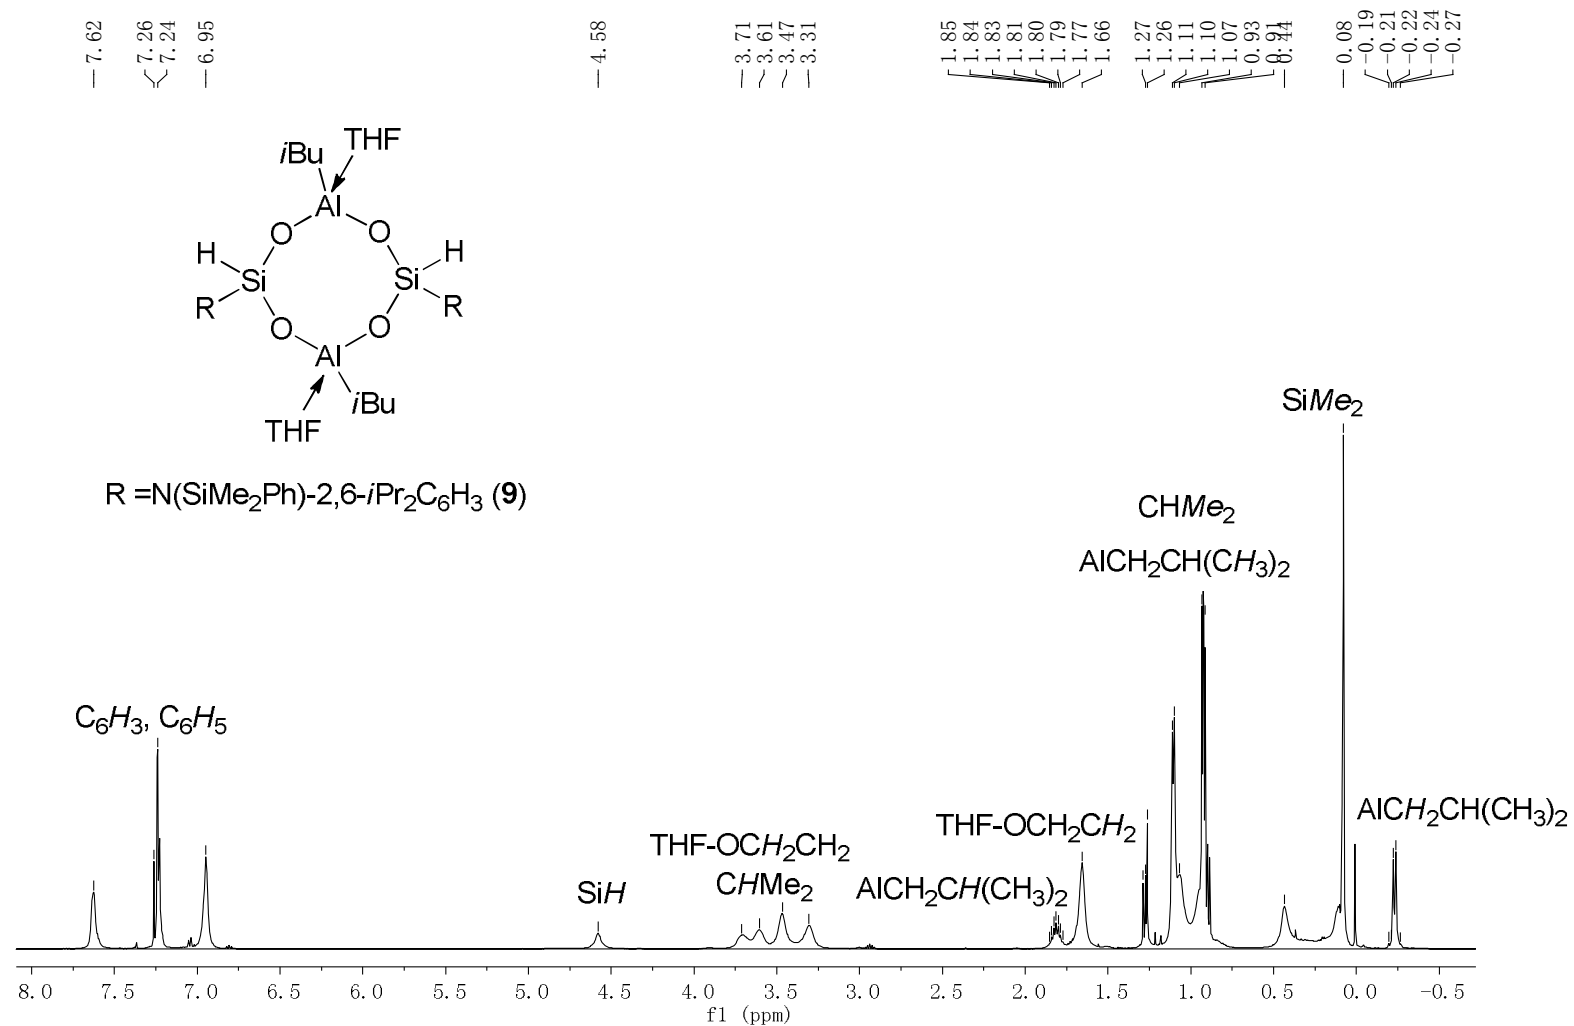

Figure S12-2  $^1\text{H}$  NMR spectrum of **9** in  $\text{CDCl}_3$

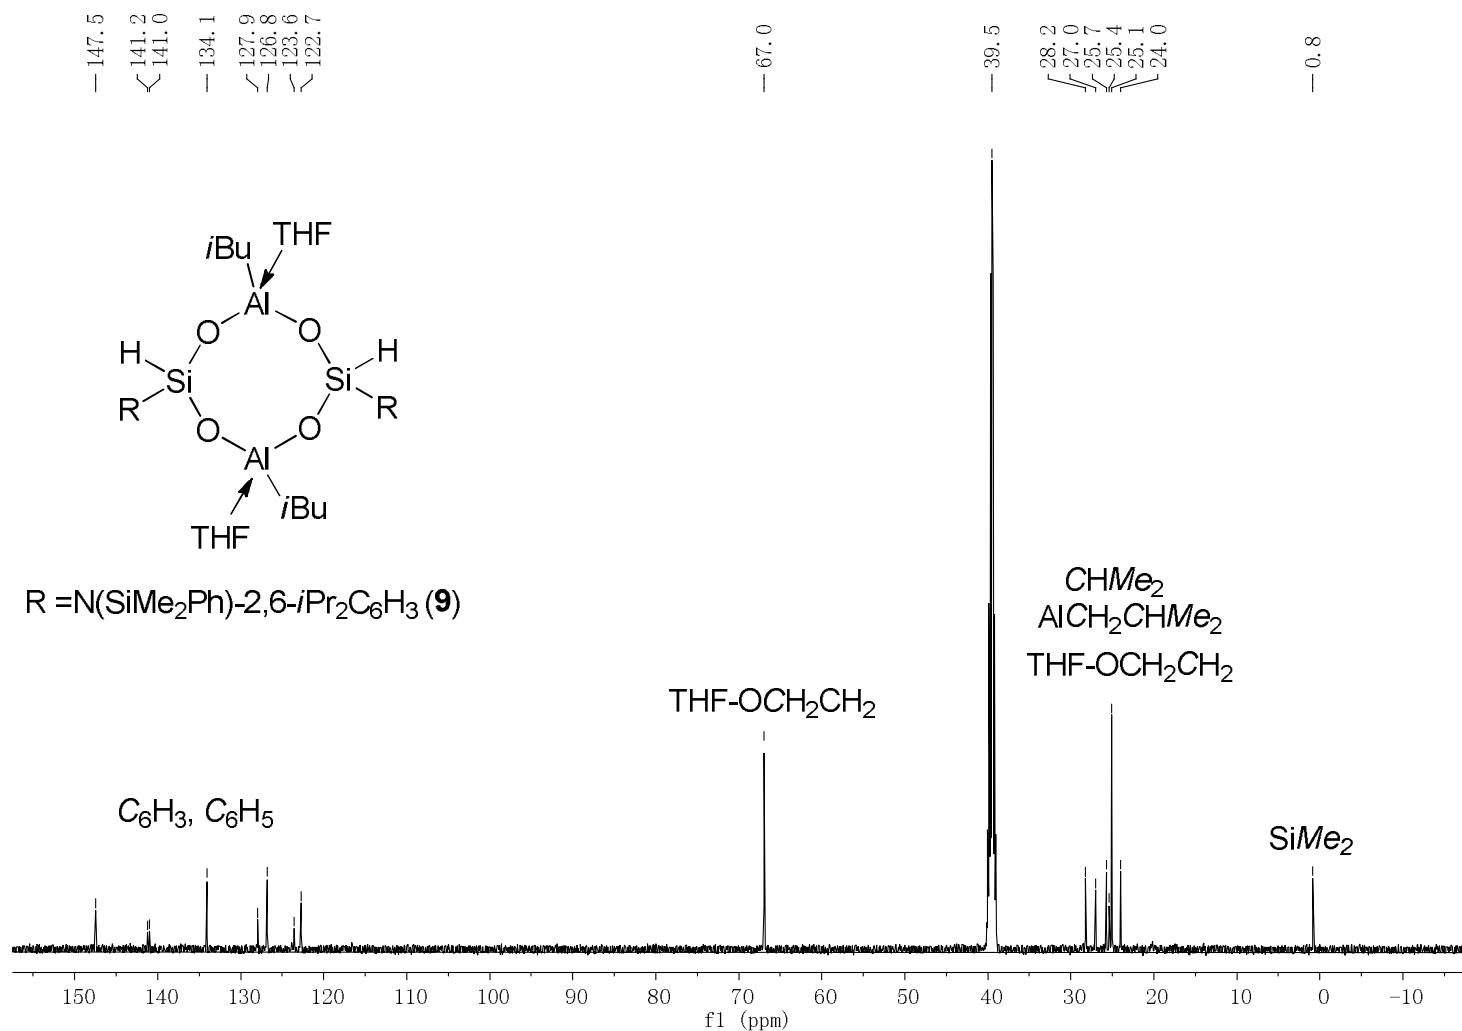

Figure S12-3  $^{13}\text{C}$  NMR spectrum of **9** in  $d^6$ -DMSO



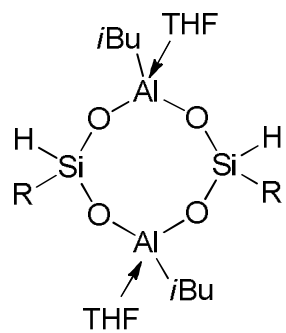

R = N(SiMe<sub>2</sub>Ph)-2,6-*i*Pr<sub>2</sub>C<sub>6</sub>H<sub>3</sub> (**9**)

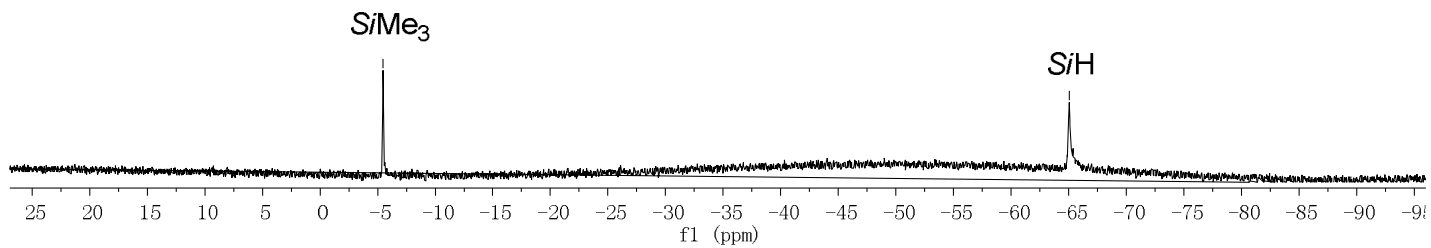

Figure S12-4 <sup>29</sup>Si NMR spectrum of **9** in CDCl<sub>3</sub>

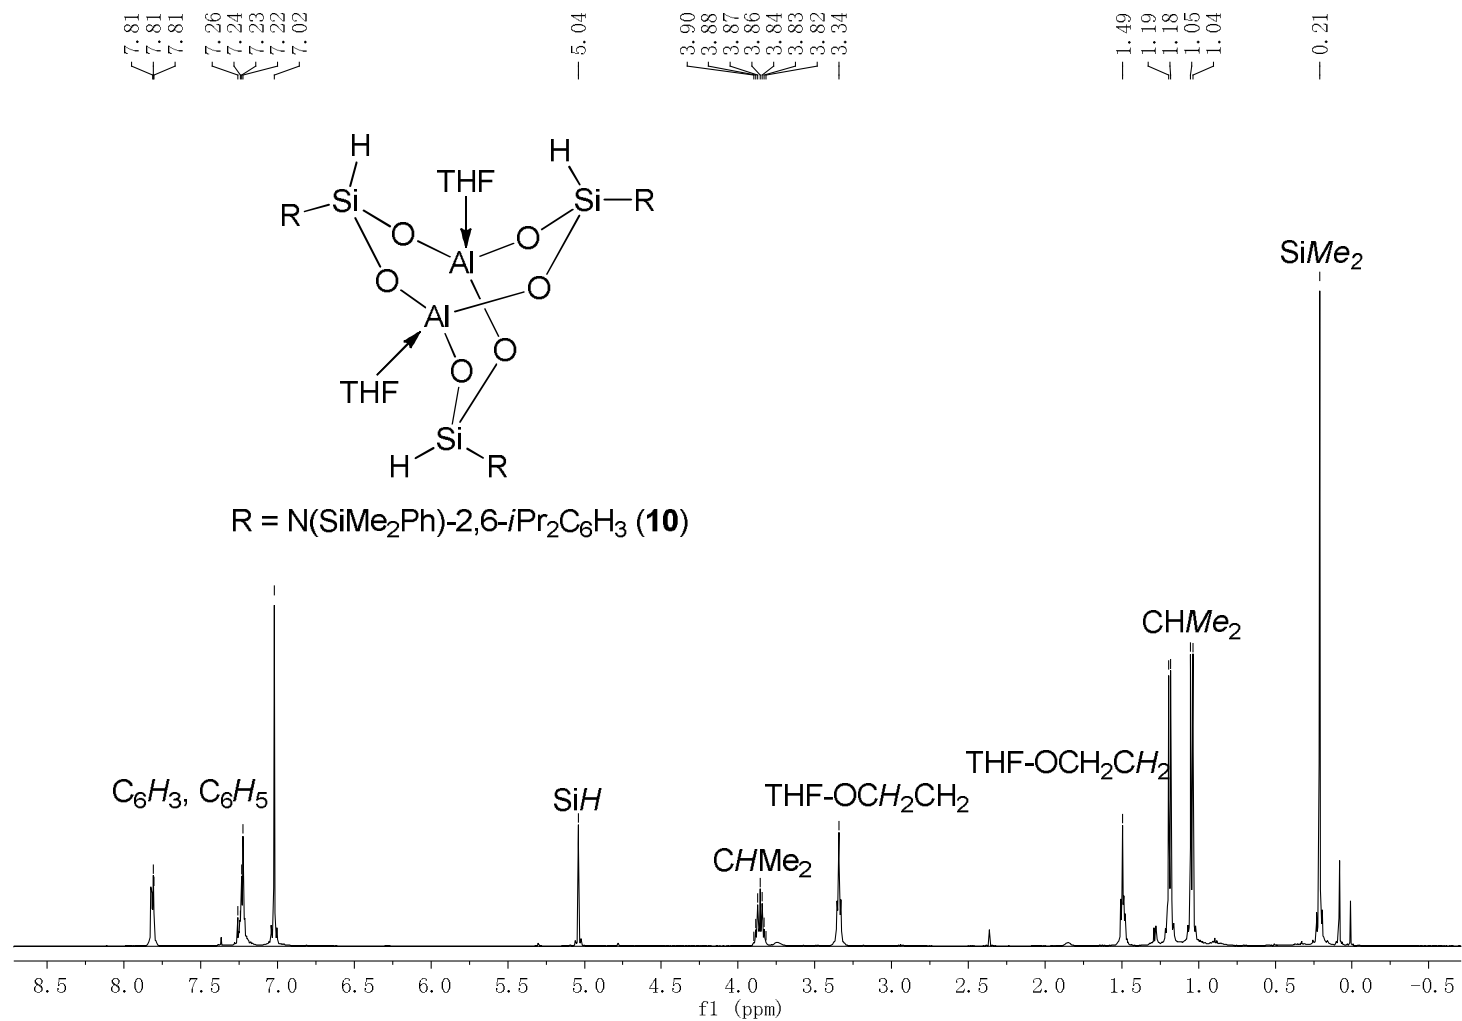

**Figure S13-1**  $^1\text{H}$  NMR spectrum of **10** in  $\text{CDCl}_3$

- 148.4  
 - 143.0  
 - 140.7  
 - 134.8  
 - 127.8  
 - 127.0  
 - 124.0  
 - 123.3

77.4  
 77.2  
 76.9  
 72.3

27.7  
 25.9  
 24.9  
 24.7

- 1.5

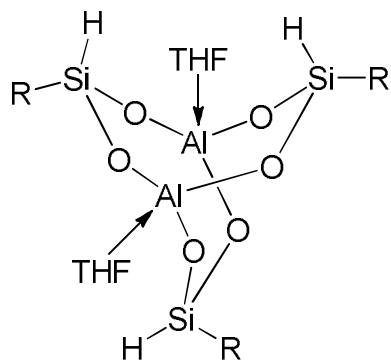

R = N(SiMe<sub>2</sub>Ph)-2,6-*i*Pr<sub>2</sub>C<sub>6</sub>H<sub>3</sub> (**10**)

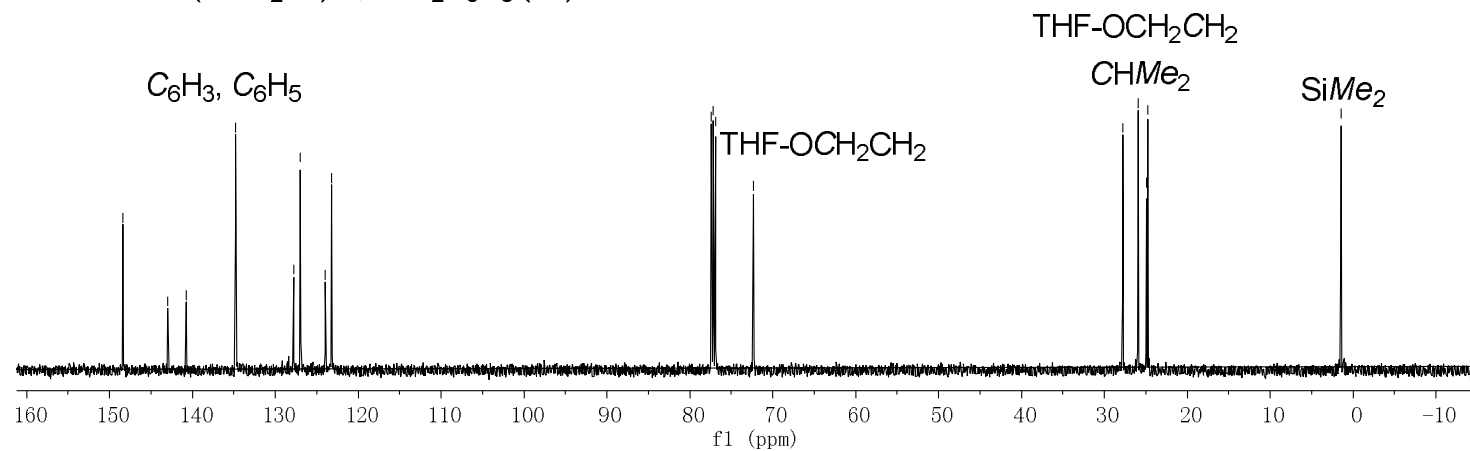

Figure S13-2 <sup>13</sup>C NMR spectrum of **10** in CDCl<sub>3</sub>

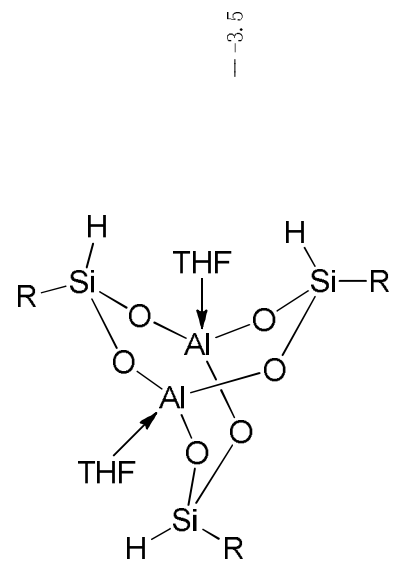

R = N(SiMe<sub>2</sub>Ph)-2,6-*i*Pr<sub>2</sub>C<sub>6</sub>H<sub>3</sub> (**10**)

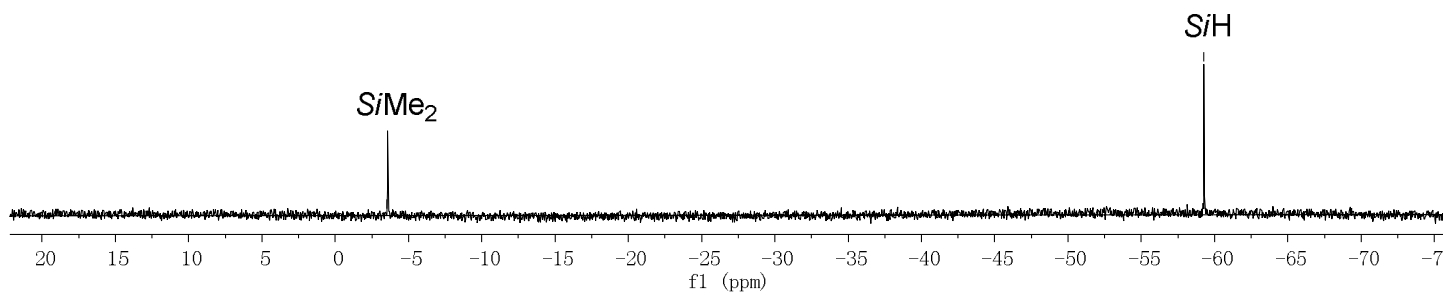

Figure S13-3 <sup>29</sup>Si NMR spectrum of **10** in CDCl<sub>3</sub>

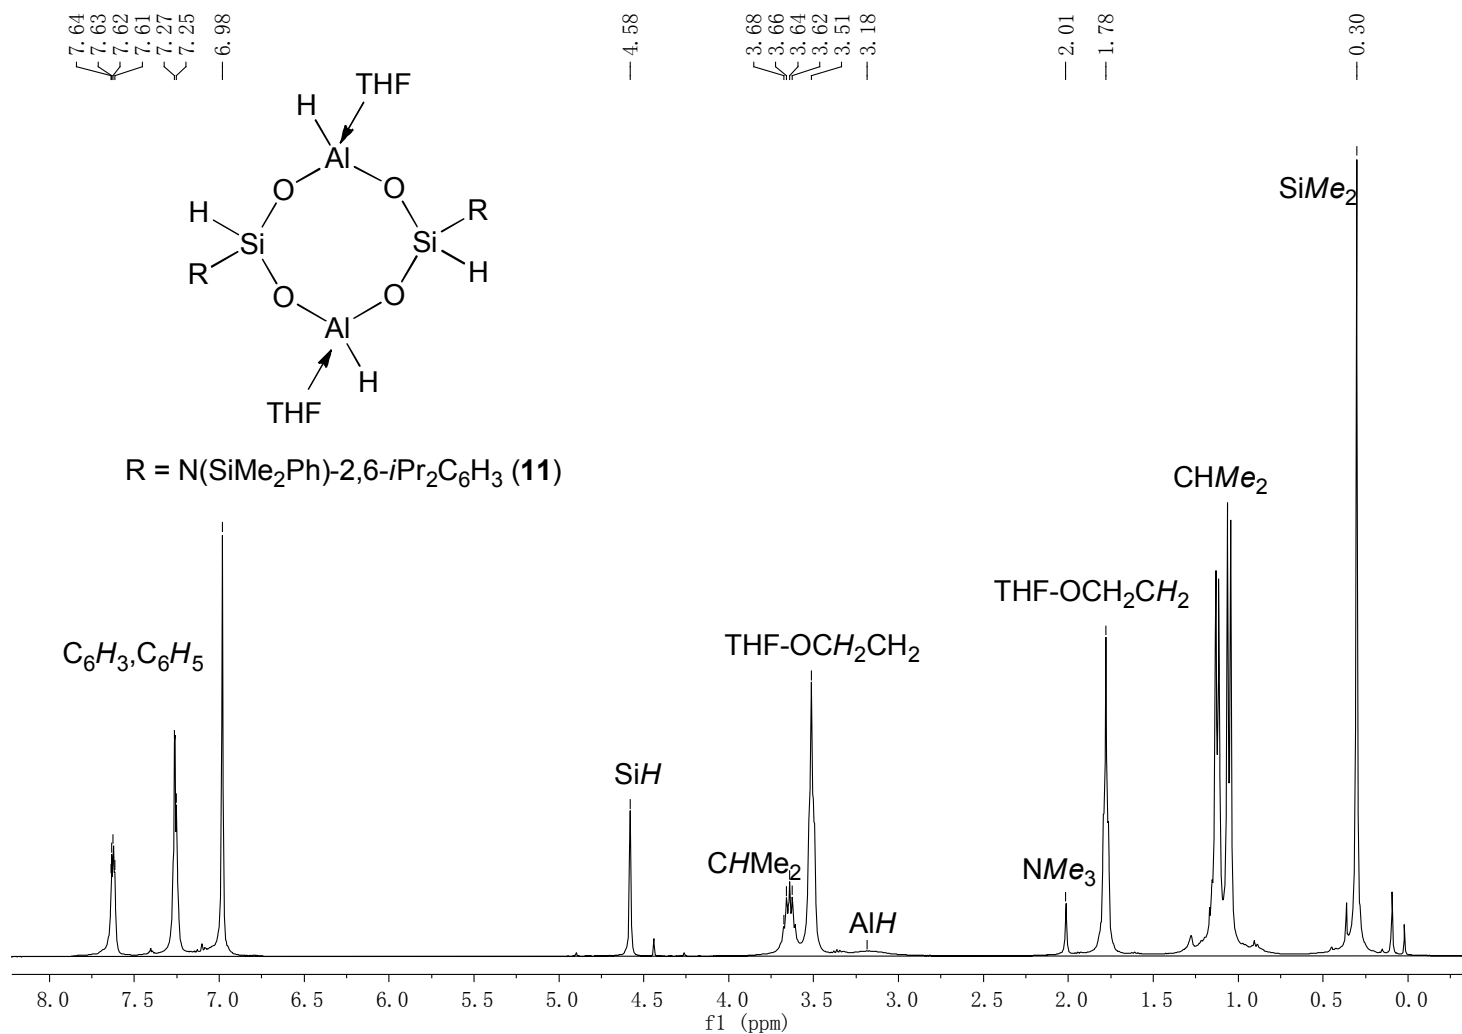

Figure S14-1  $^1\text{H}$  NMR spectrum of **11** in  $\text{CDCl}_3$

— 148.2  
 < 142.0  
 < 141.0  
 — 134.7  
 < 128.4  
 < 127.2  
 < 123.7  
 < 123.1

< 77.4  
 < 77.2  
 < 76.9  
 — 70.0

< 27.9  
 < 26.0  
 < 25.2  
 < 24.1

— 0.2

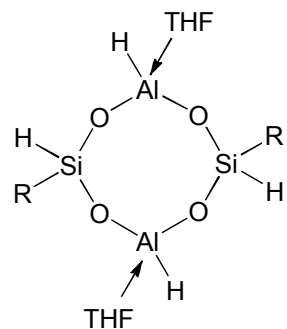

R = N(SiMe<sub>2</sub>Ph)-2,6-*i*Pr<sub>2</sub>C<sub>6</sub>H<sub>3</sub> (**11**)

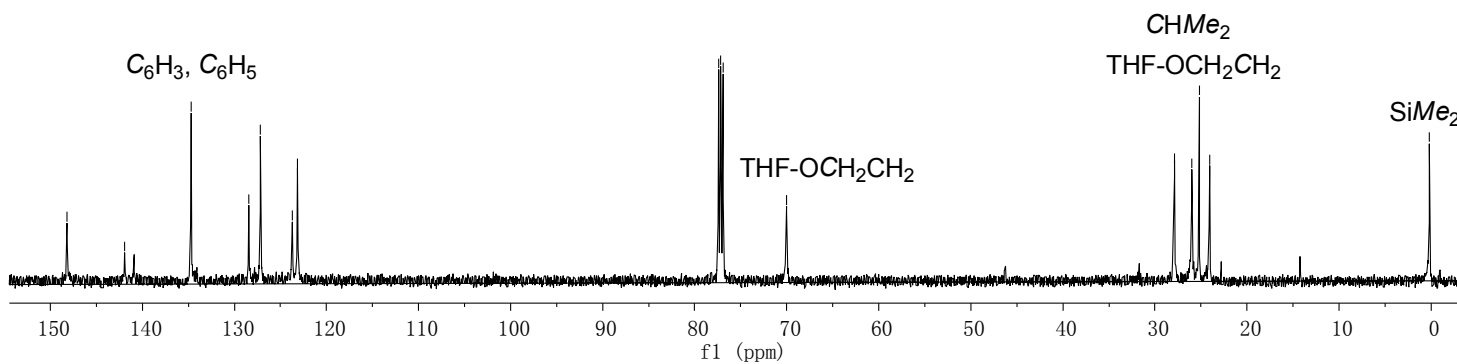

Figure S14-2 <sup>13</sup>C NMR spectrum of **11** in CDCl<sub>3</sub>

— -5.4

— -65.7

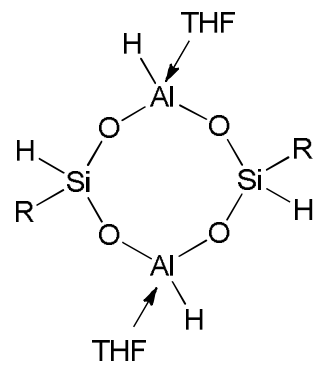

R = N(SiMe<sub>2</sub>Ph)-2,6-*i*Pr<sub>2</sub>C<sub>6</sub>H<sub>3</sub> (**11**)

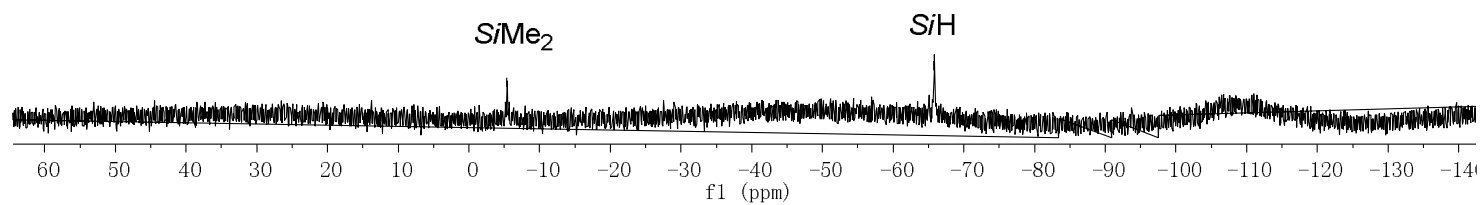

**Figure S14-3** <sup>29</sup>Si NMR spectrum of **11** in CDCl<sub>3</sub>
